# Supplementary material for: Exposure of HepaRG Cells to Sodium Saccharin Underpins the Importance of Including Non-Hepatotoxic Compounds When Investigating Toxicological Modes of Action Using Metabolomics
Source: MDPI journal article supplement (doi:10.3390/metabo9110265), 2019-11-04

# experiment 1

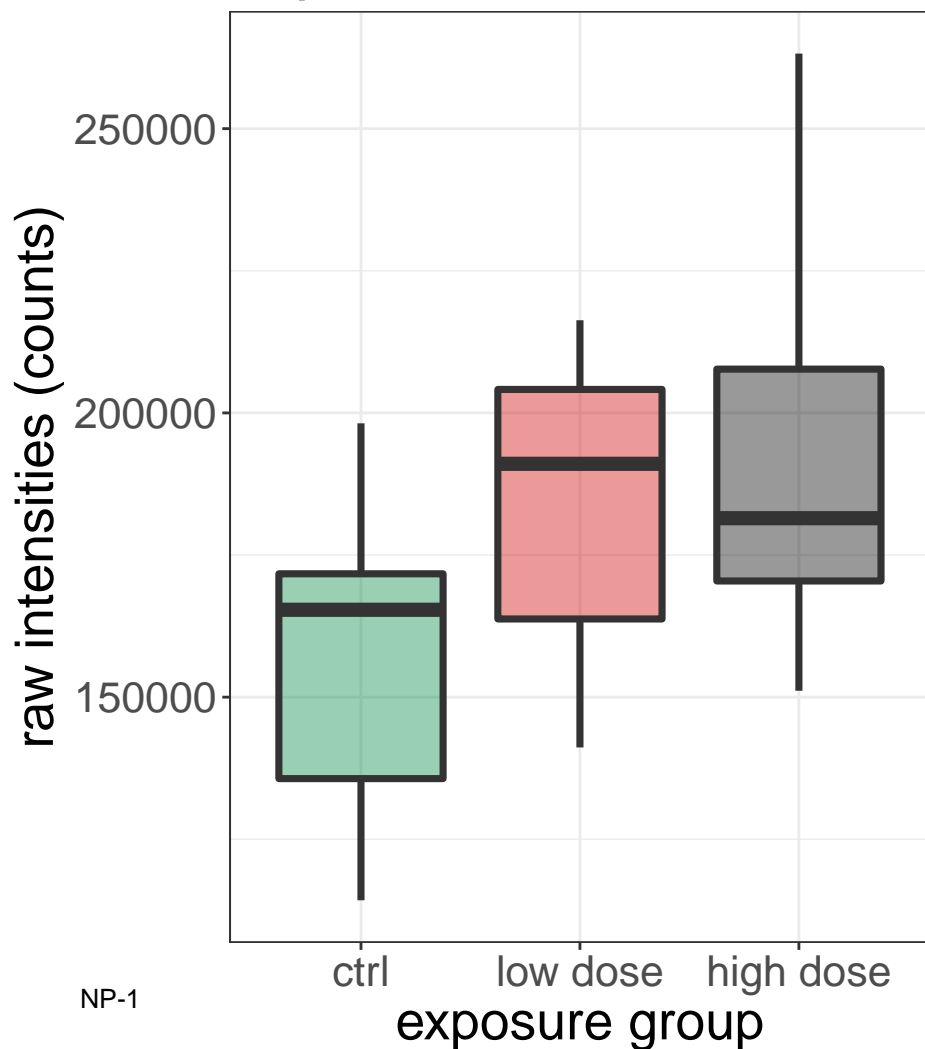

# experiment 2

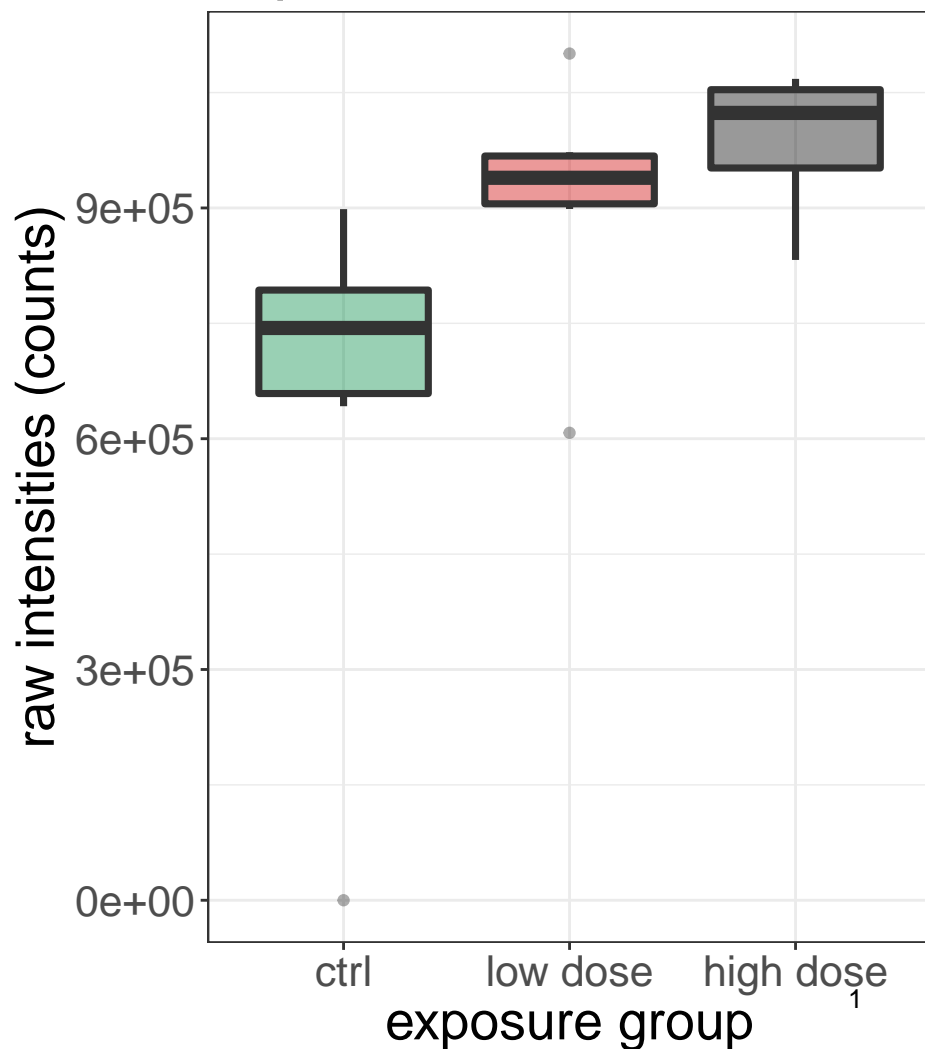

# experiment 1

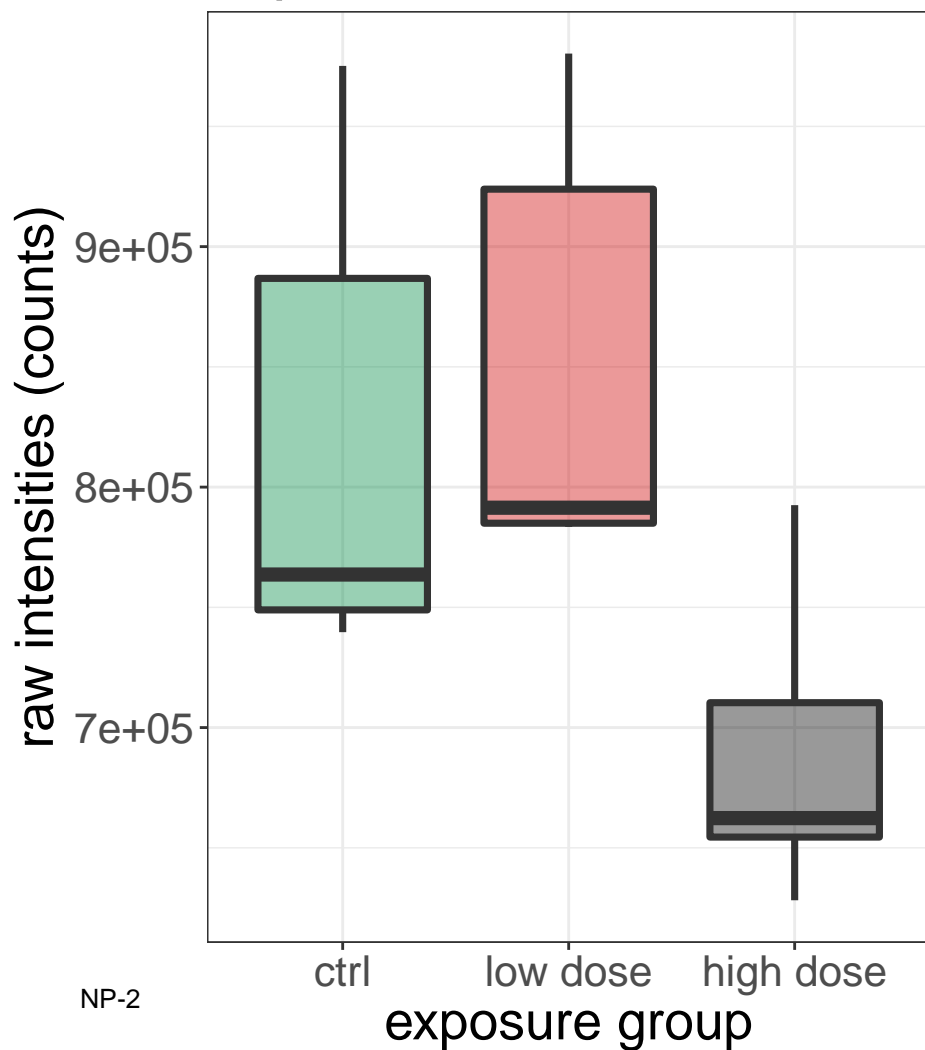

# experiment 2

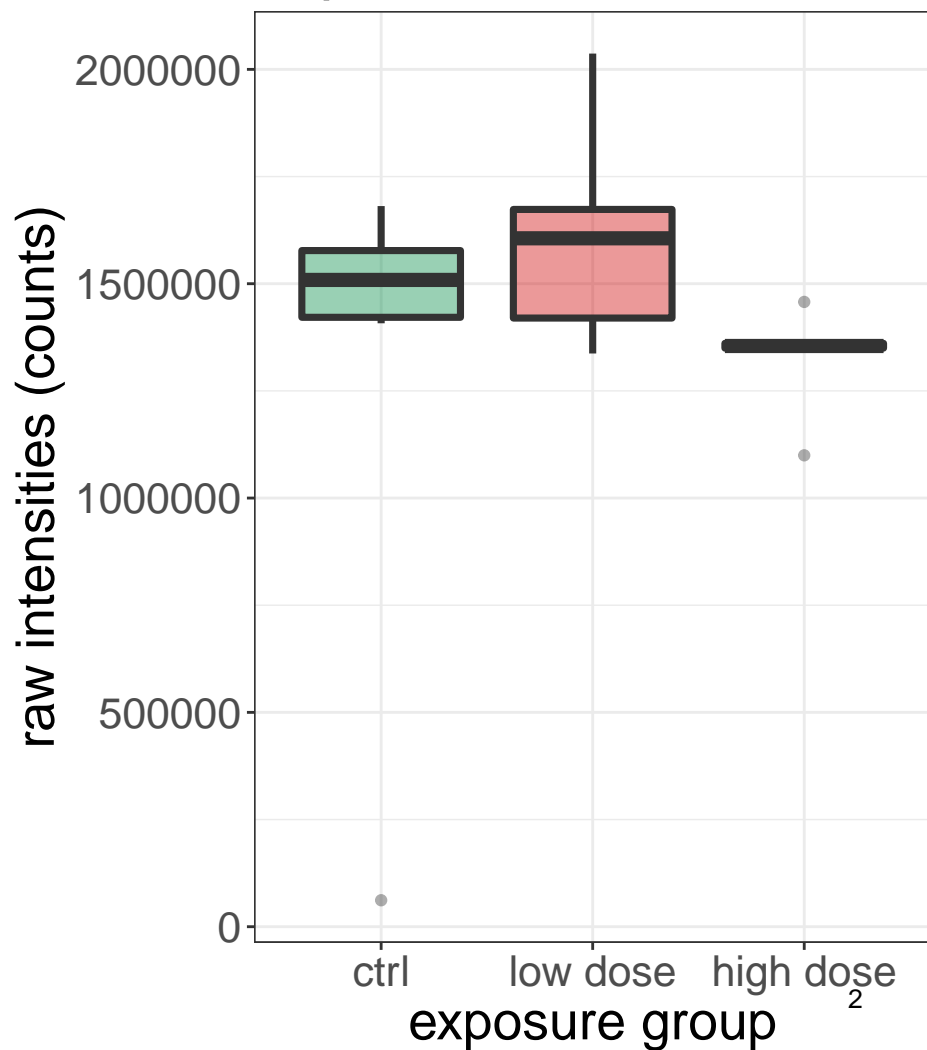

# experiment 1

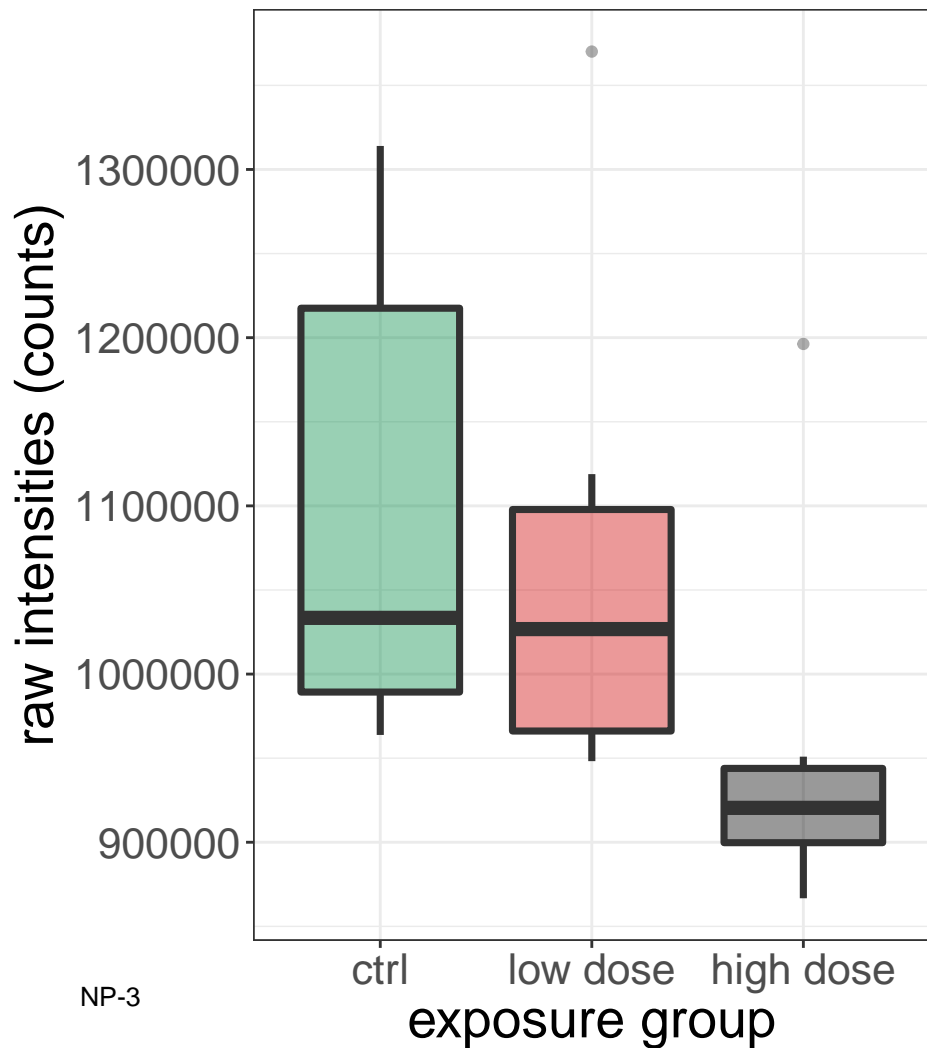

# experiment 2

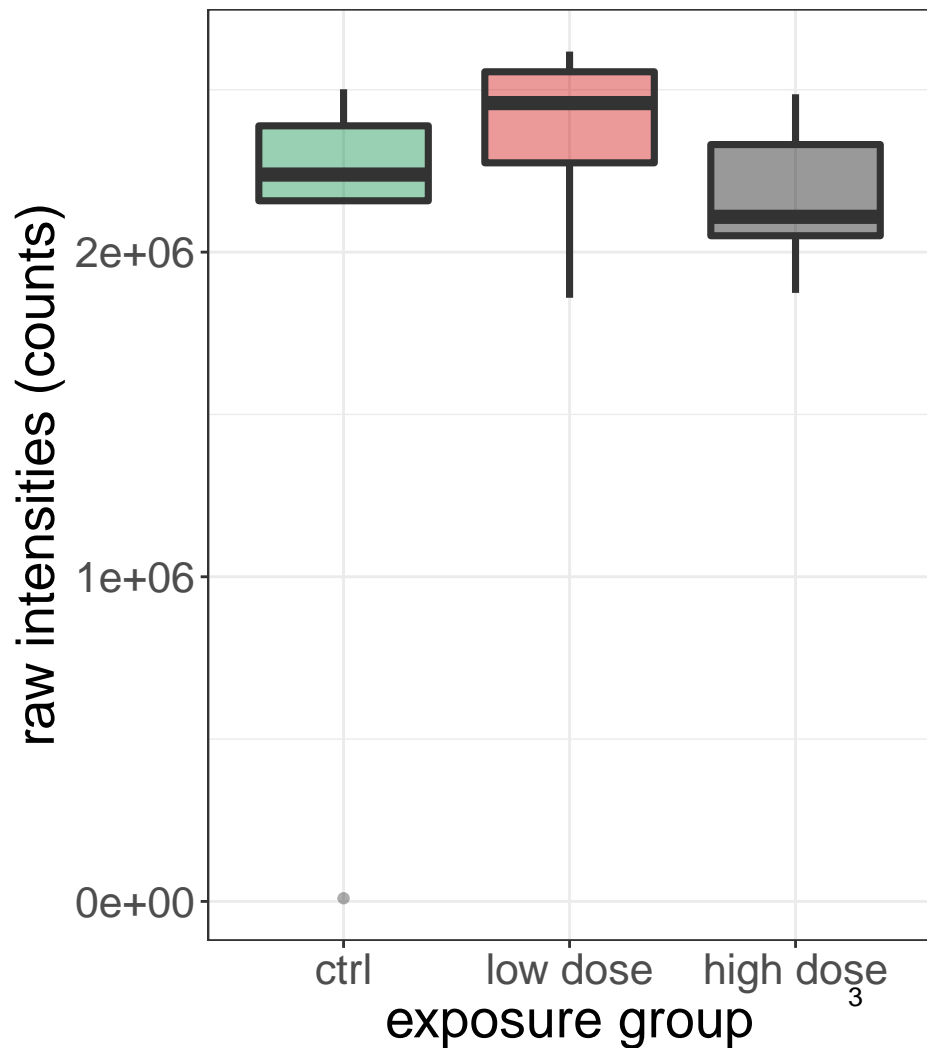

# experiment 1

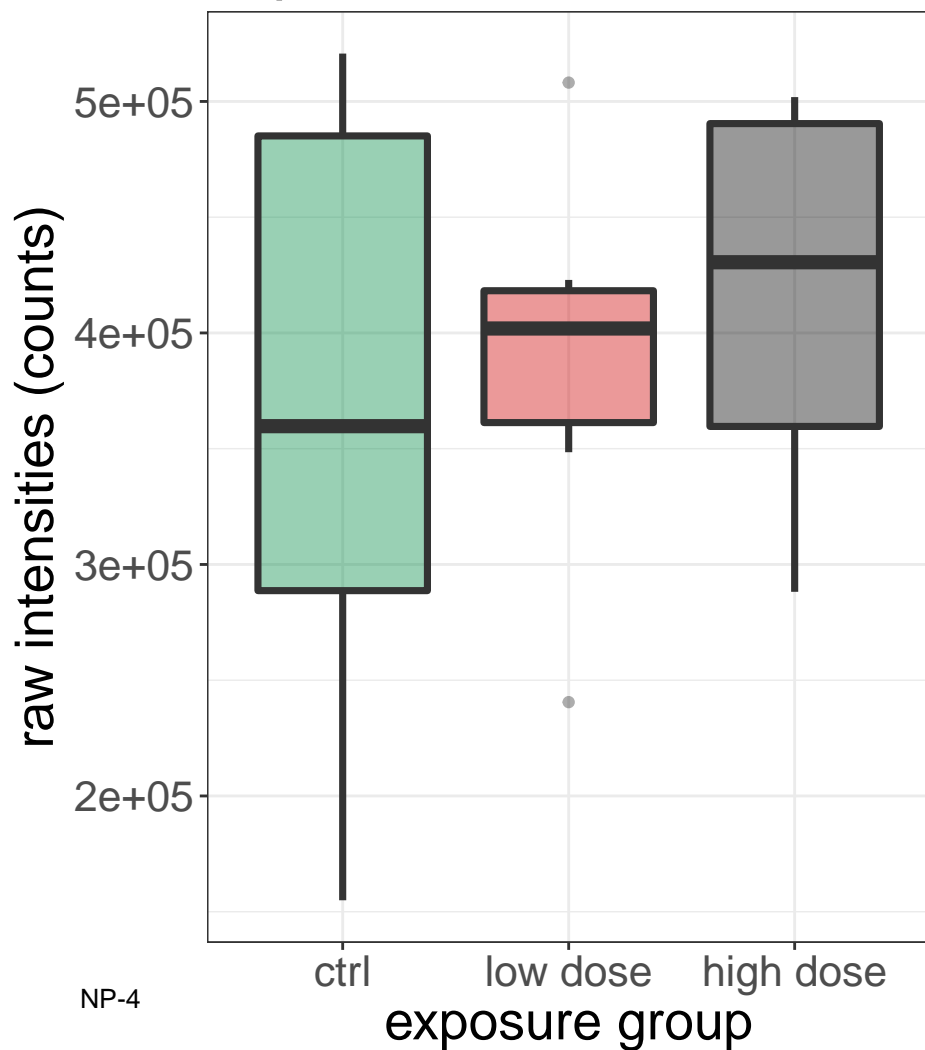

# experiment 2

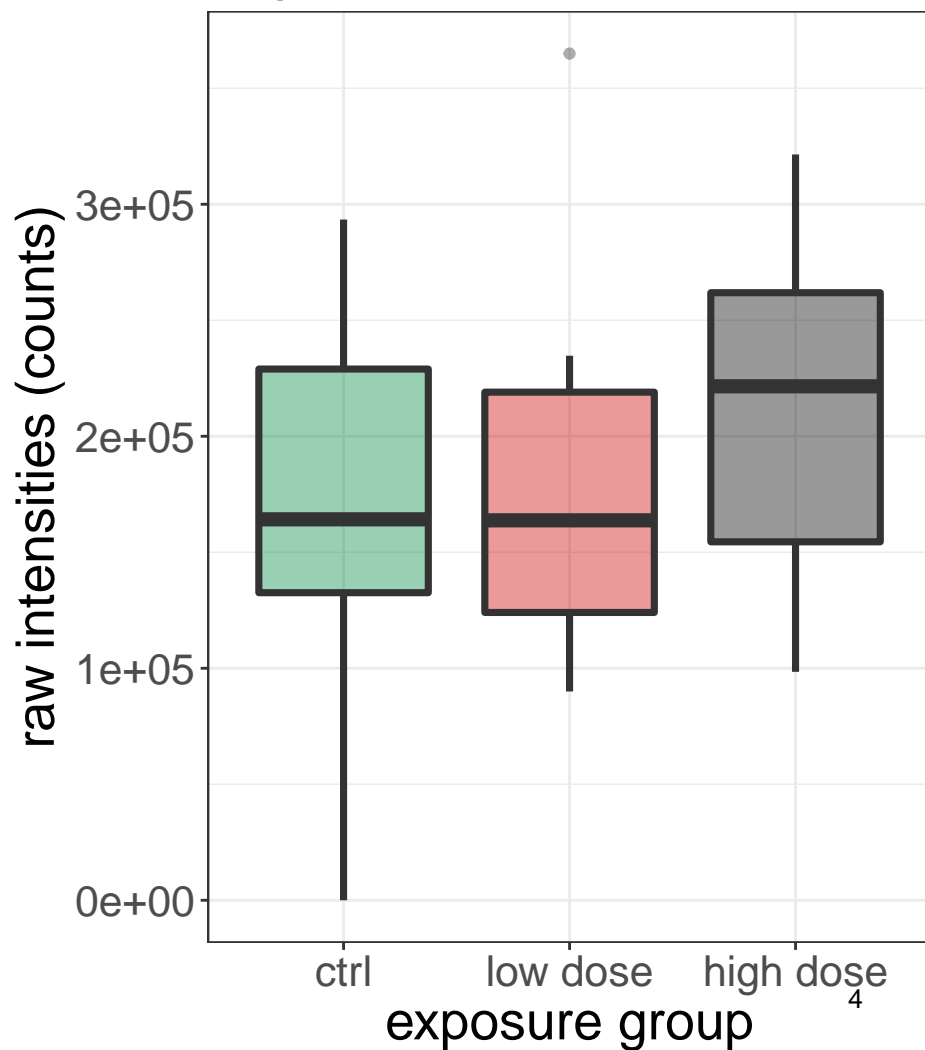

# experiment 1

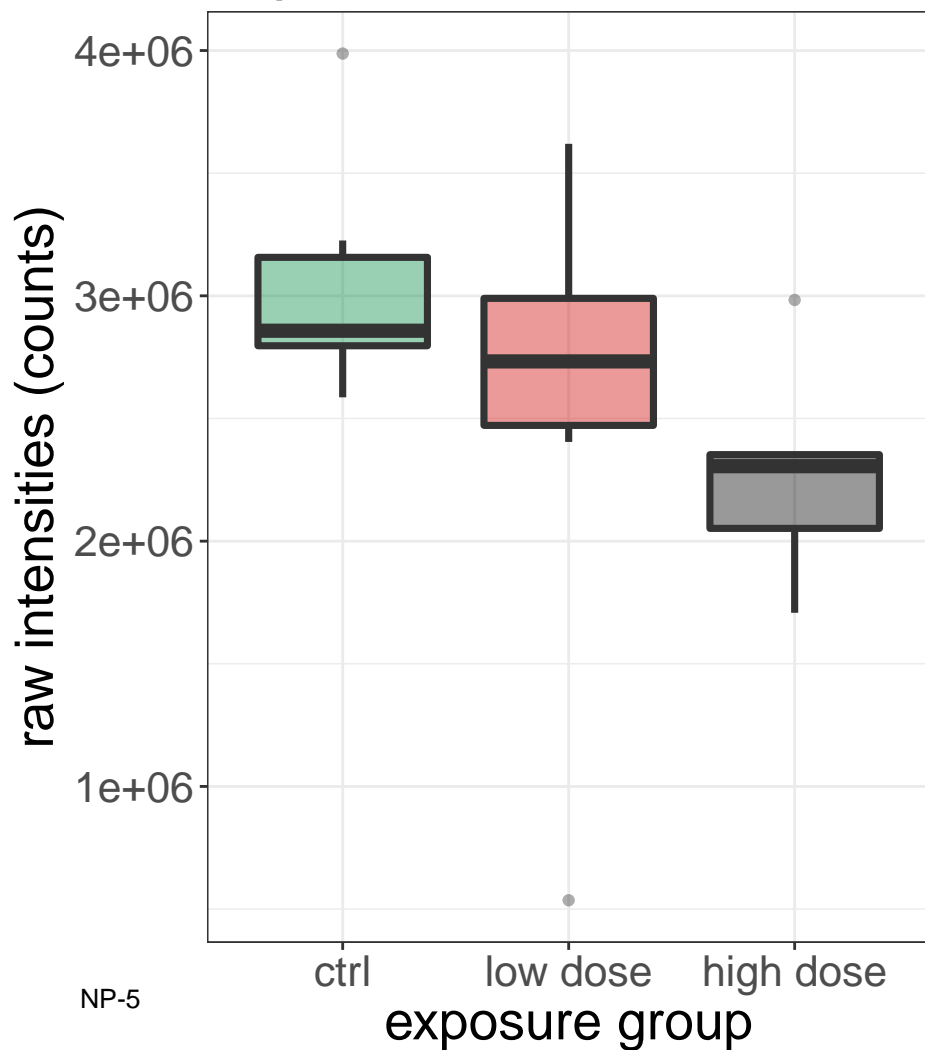

# experiment 2

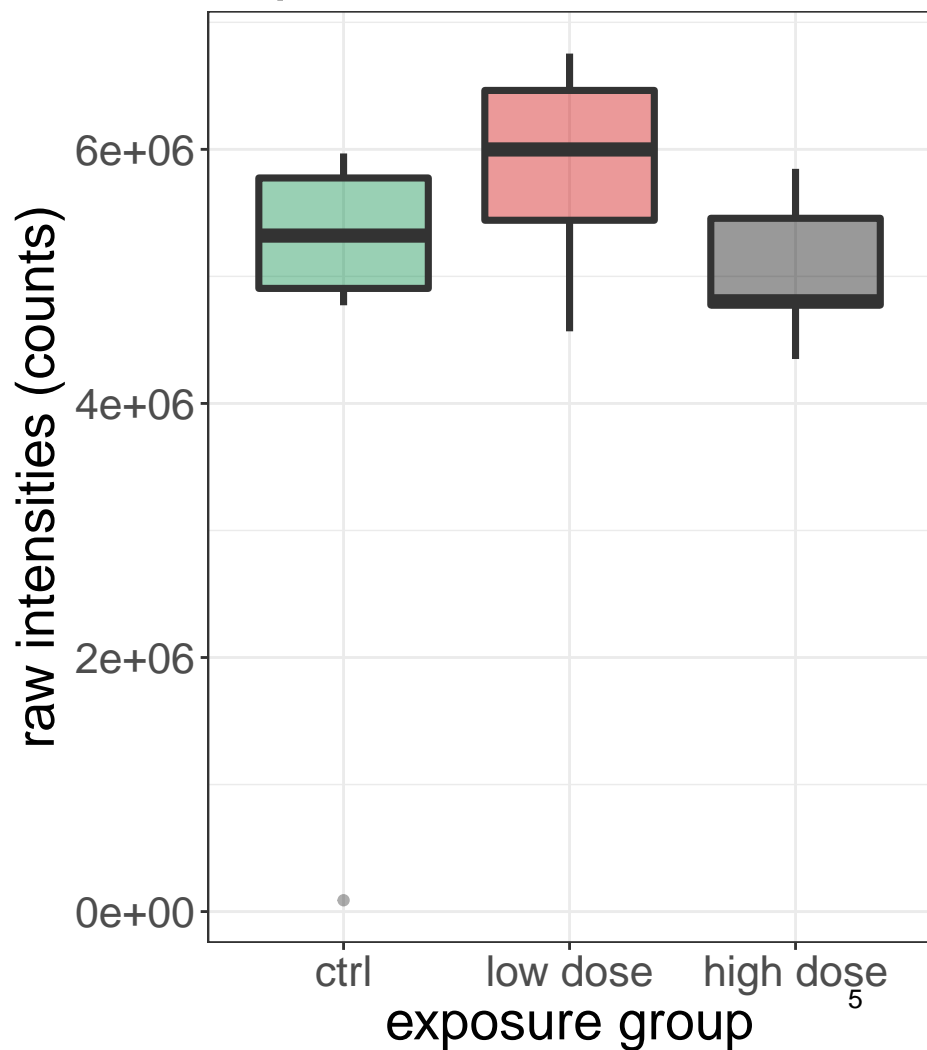

# experiment 1

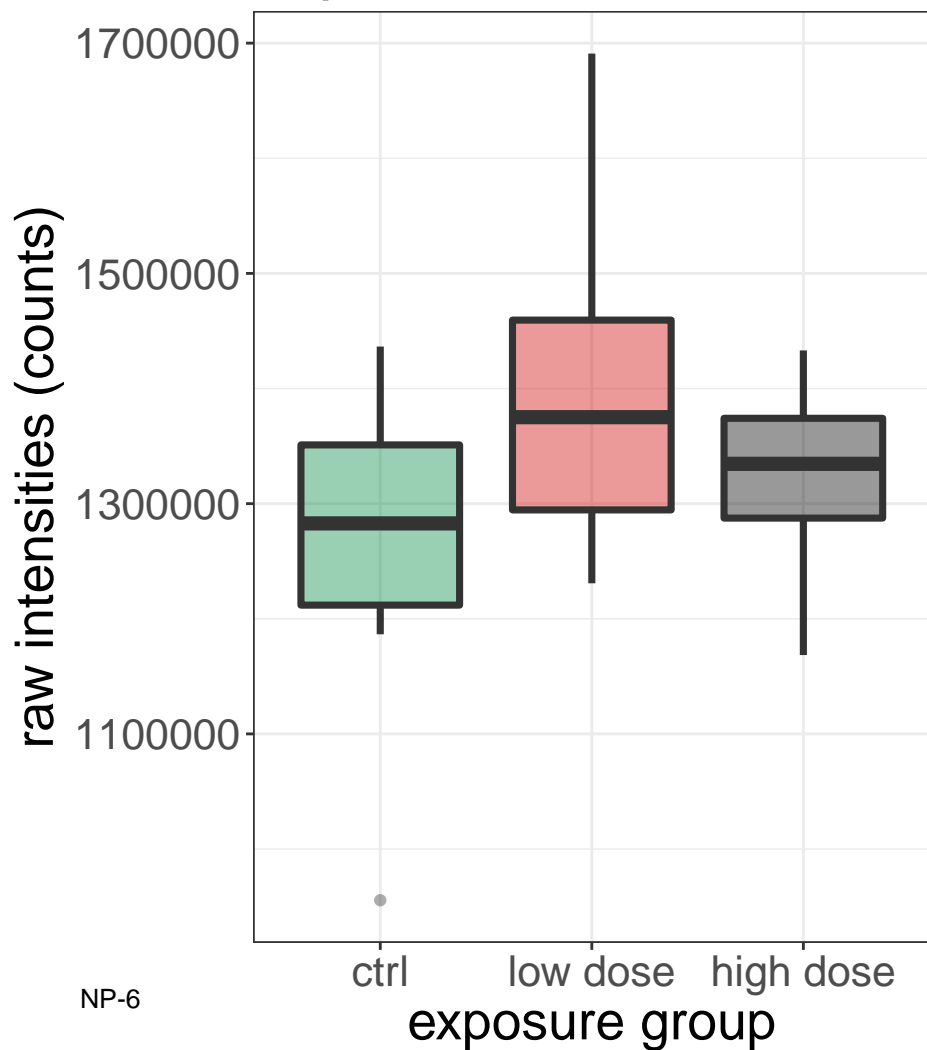

# experiment 2

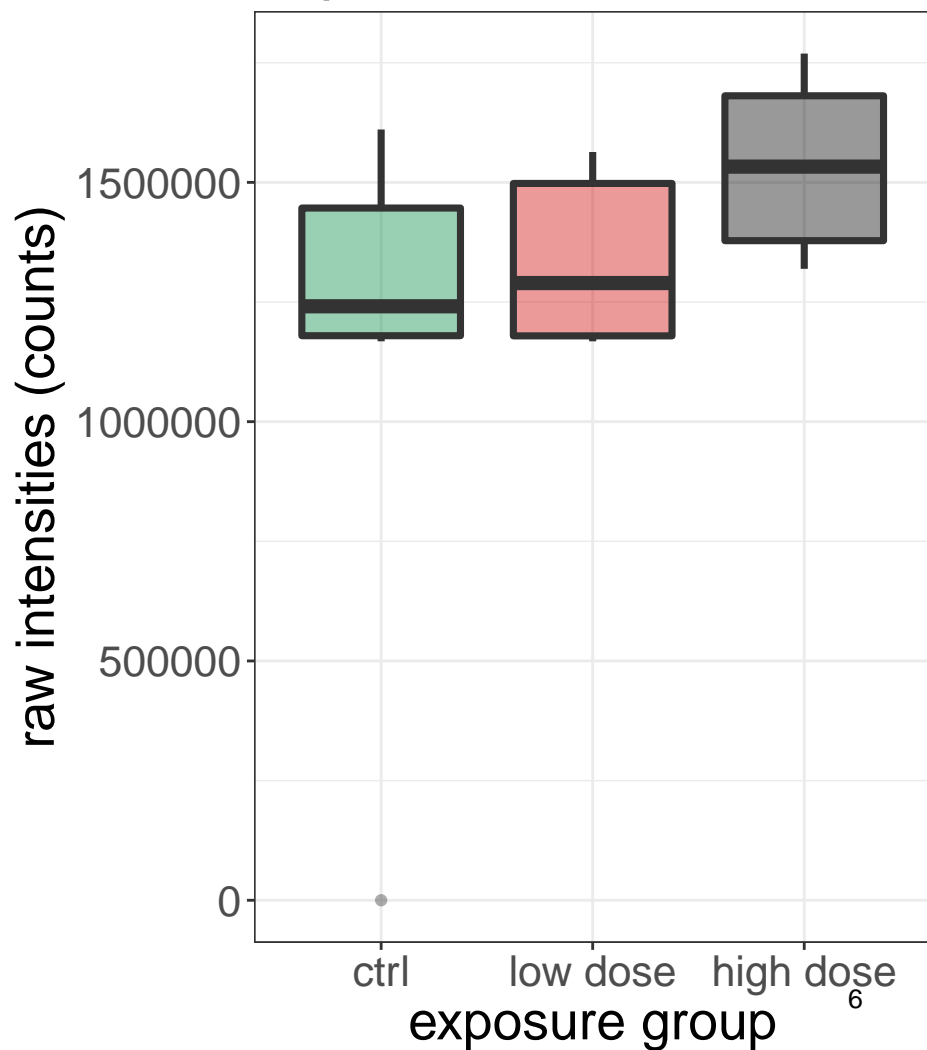

# experiment 1

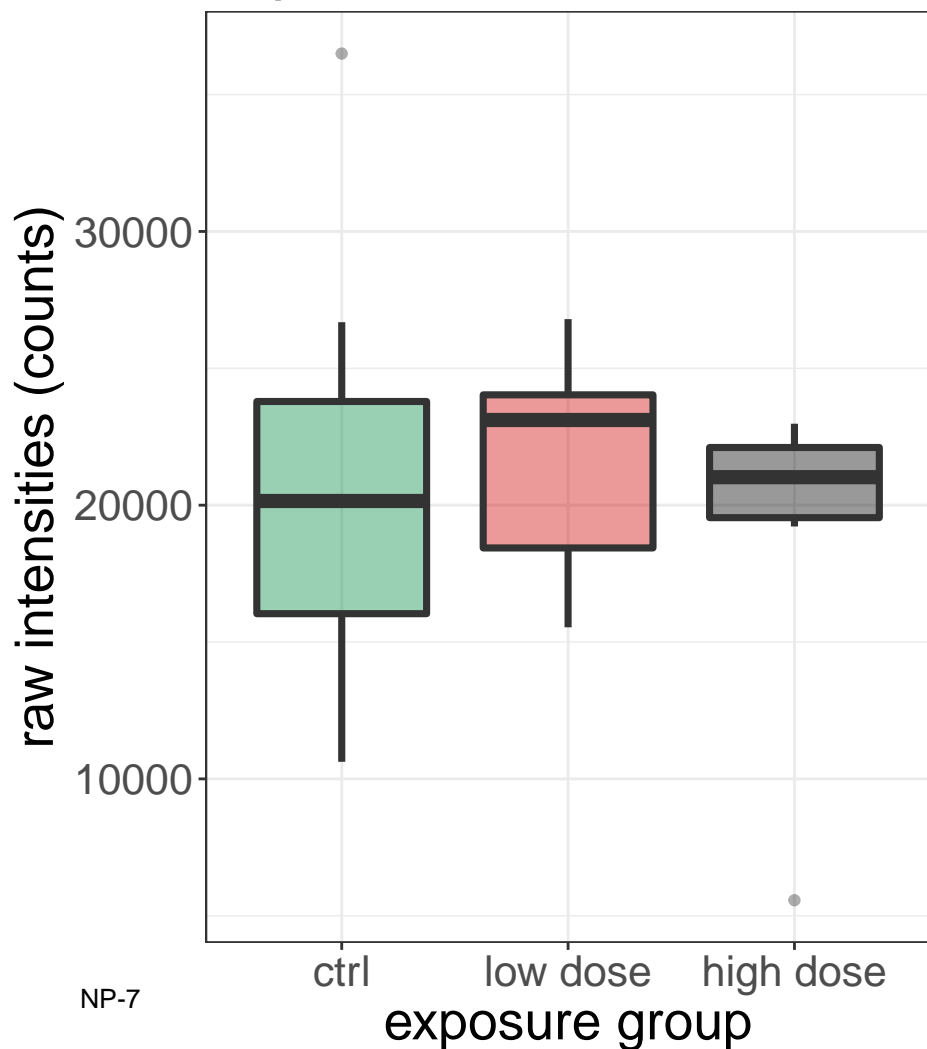

# experiment 2

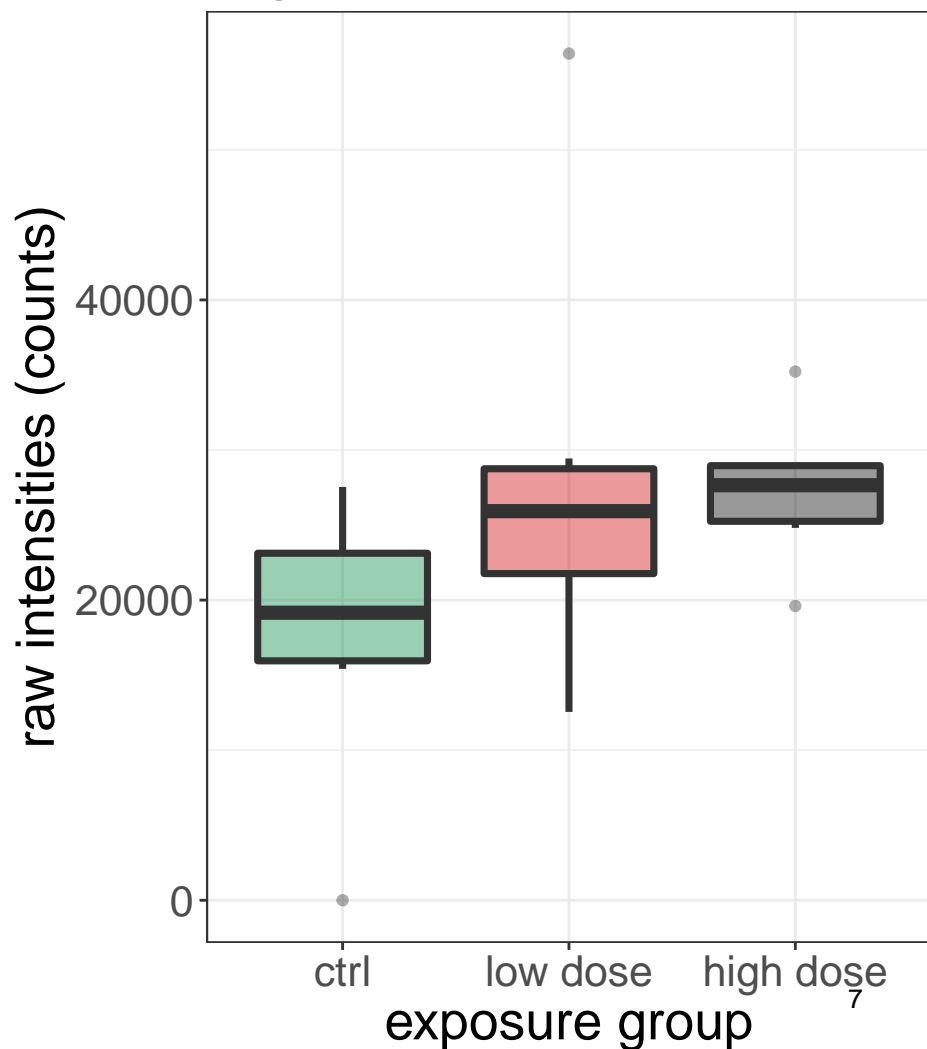

# experiment 1

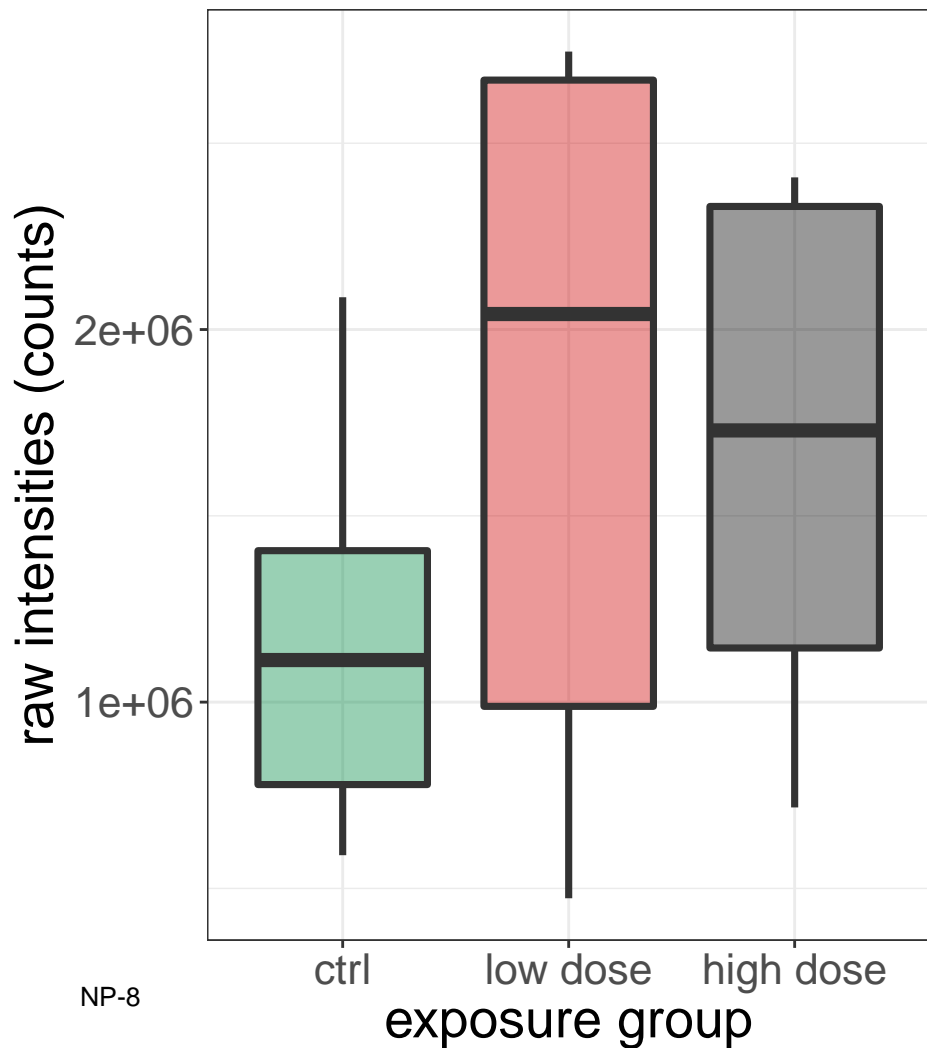

# experiment 2

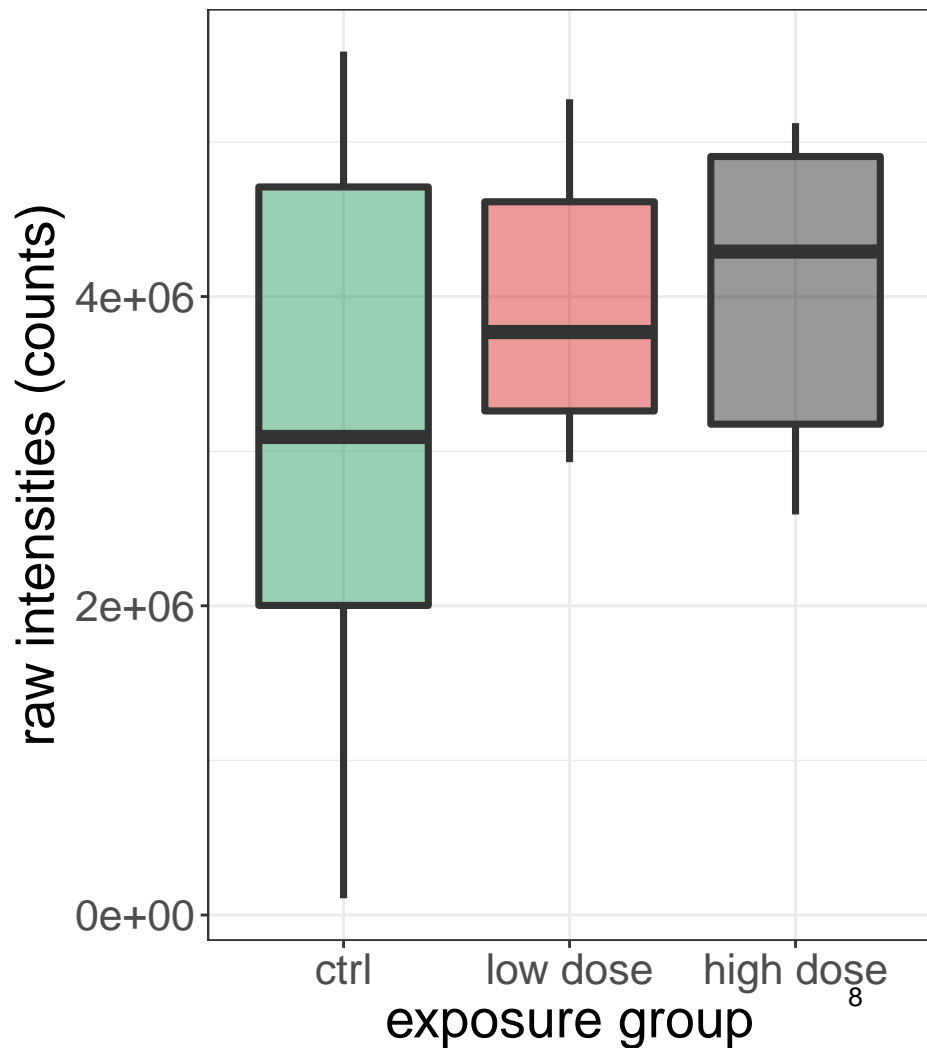



# experiment 1

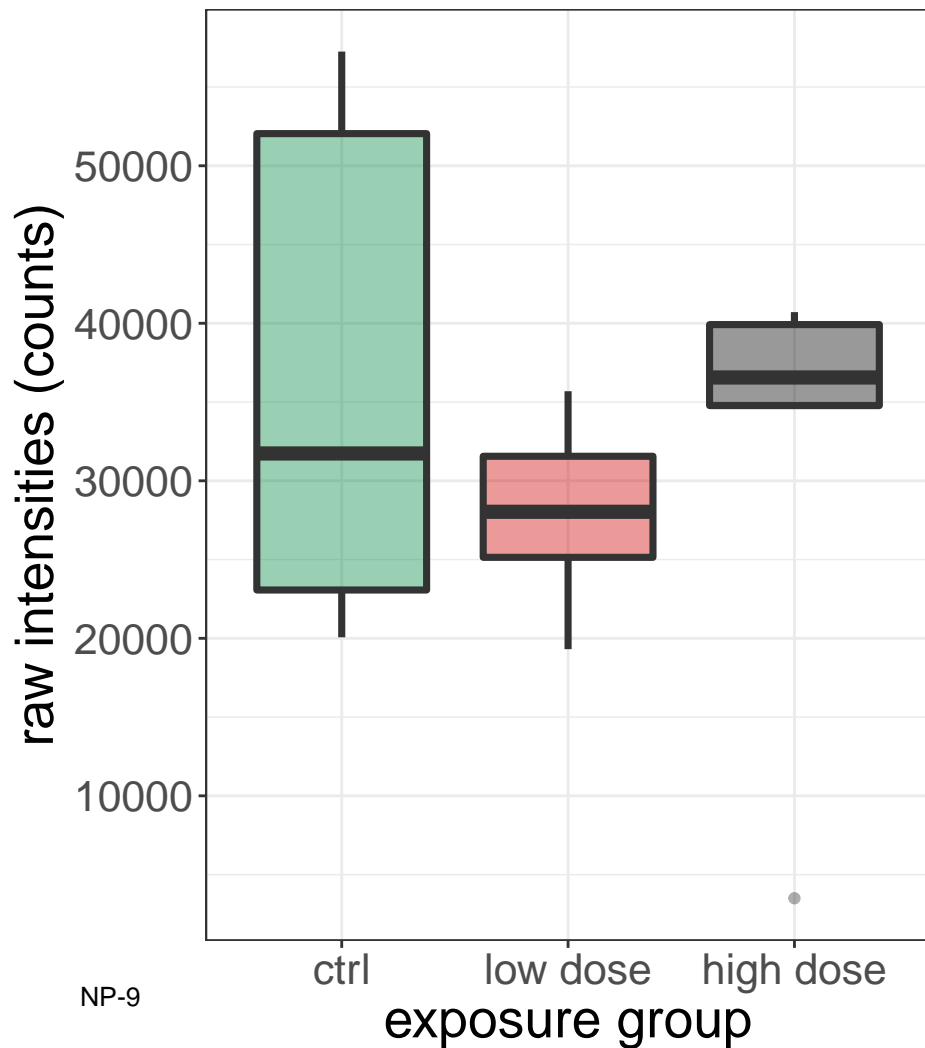

# experiment 2

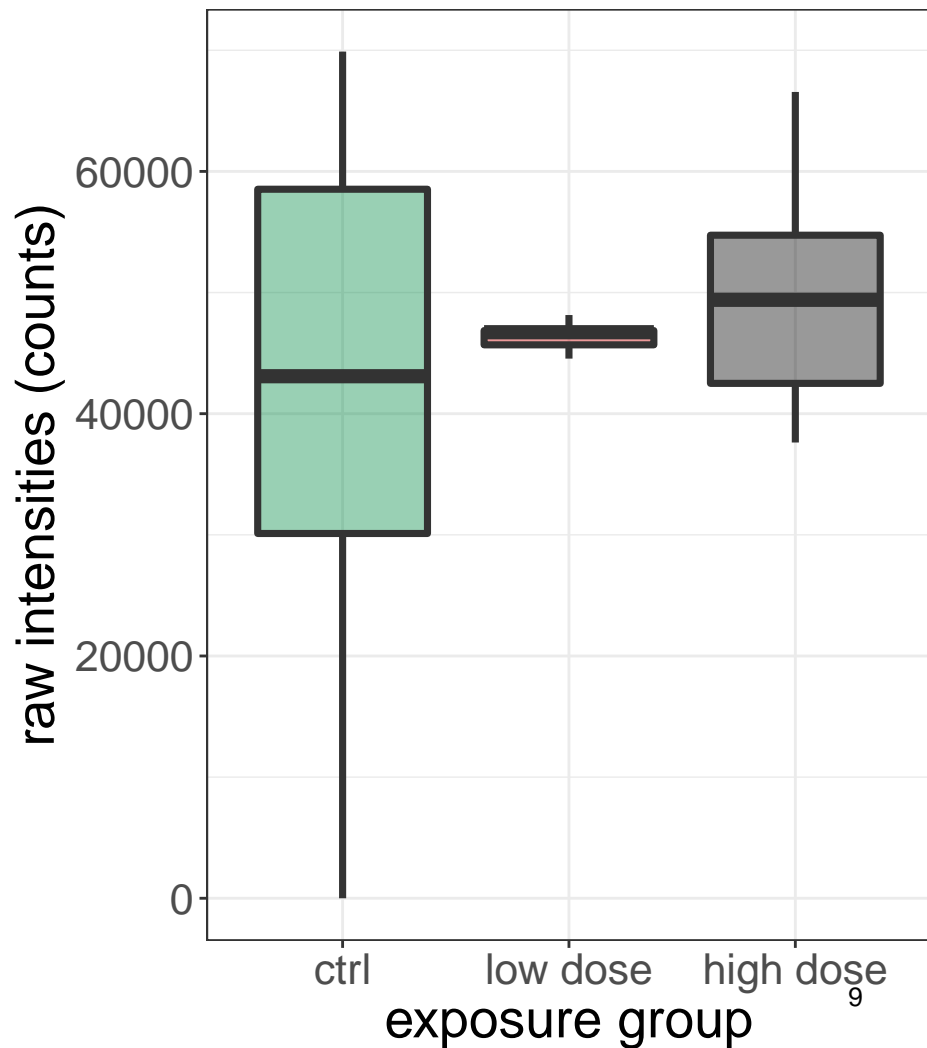

# experiment 1

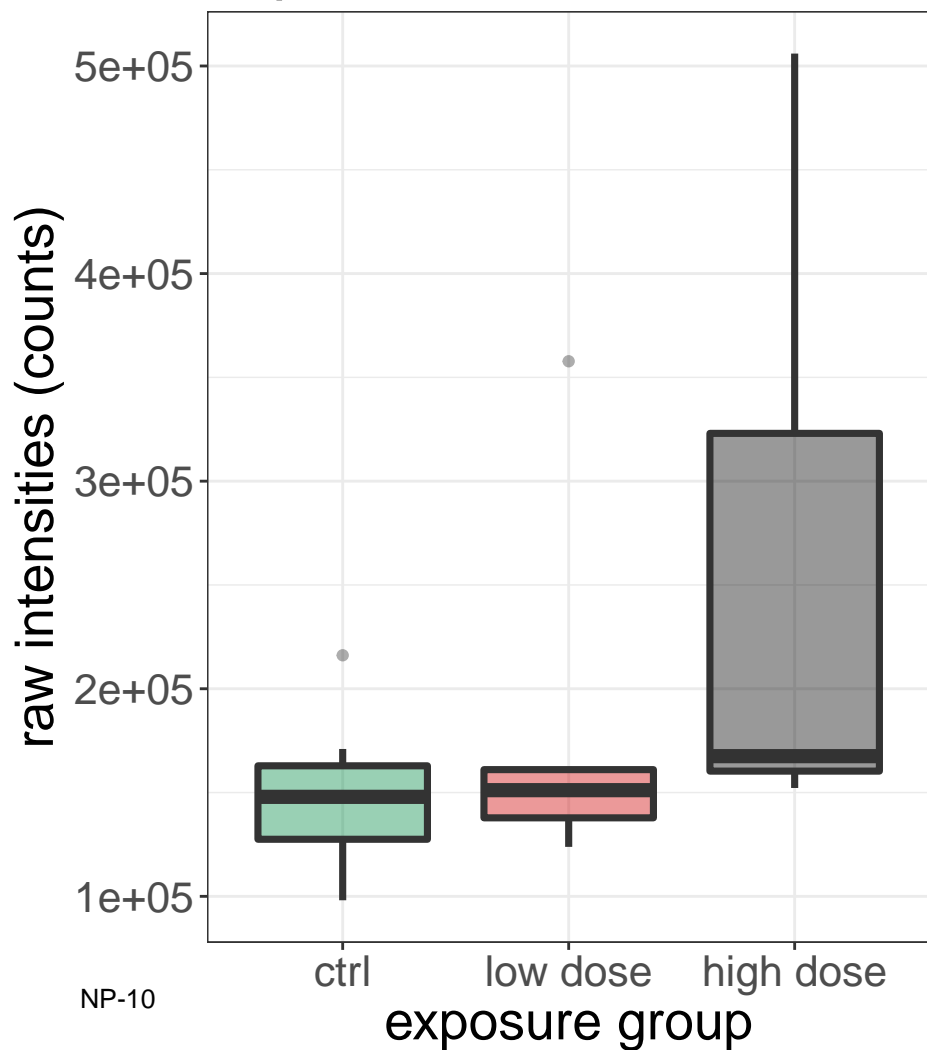

# experiment 2

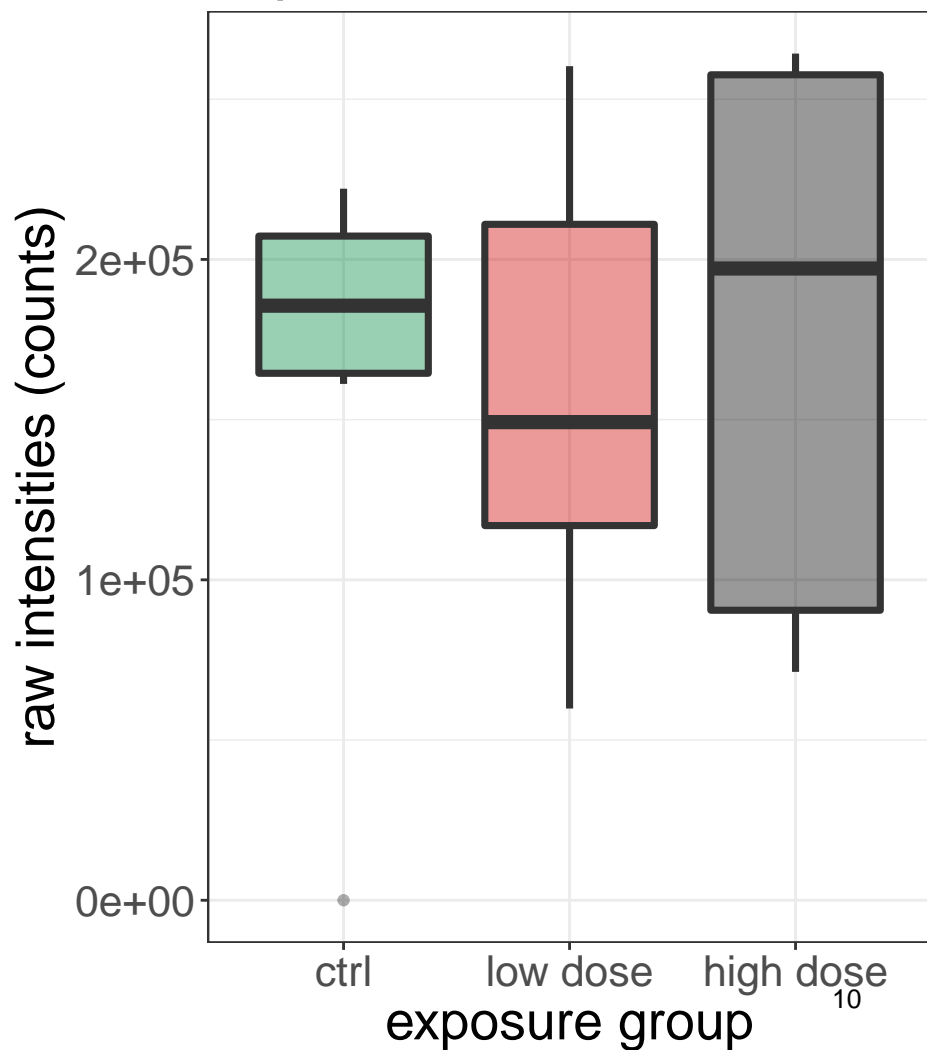

# experiment 1

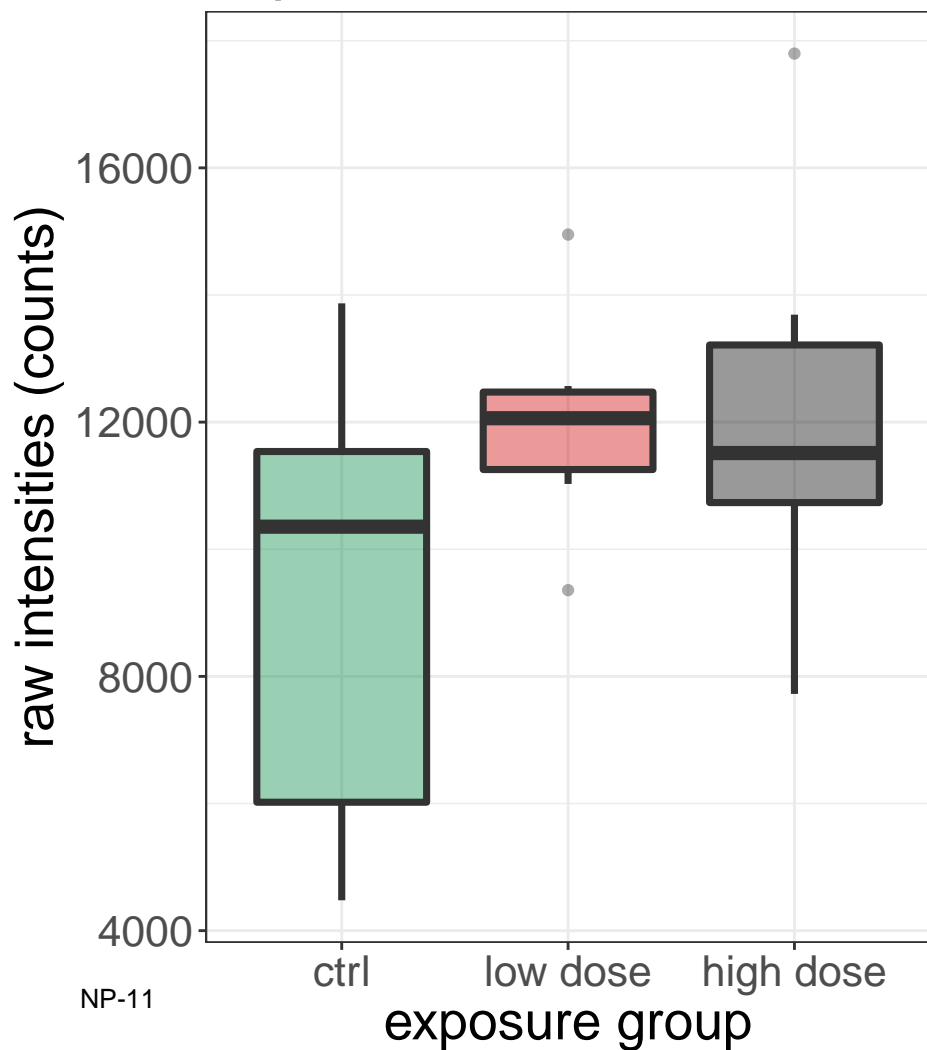

# experiment 2

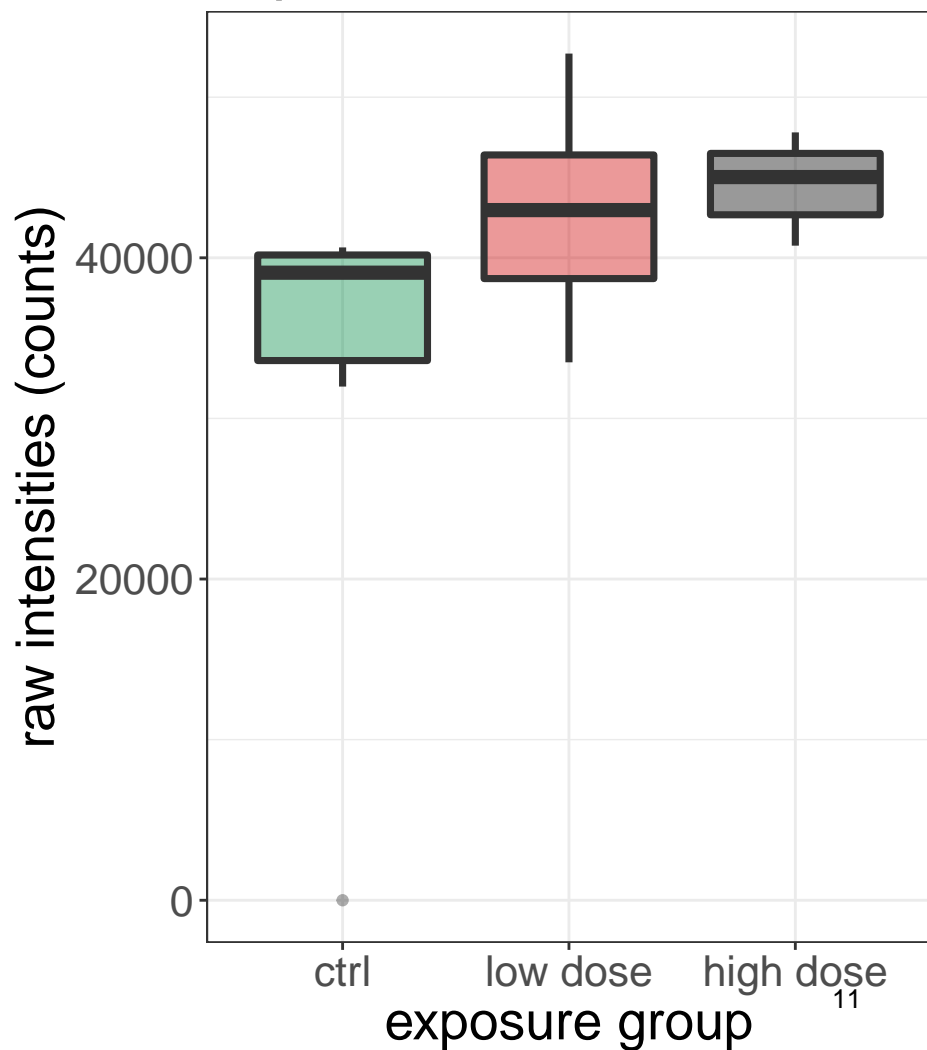

# experiment 1

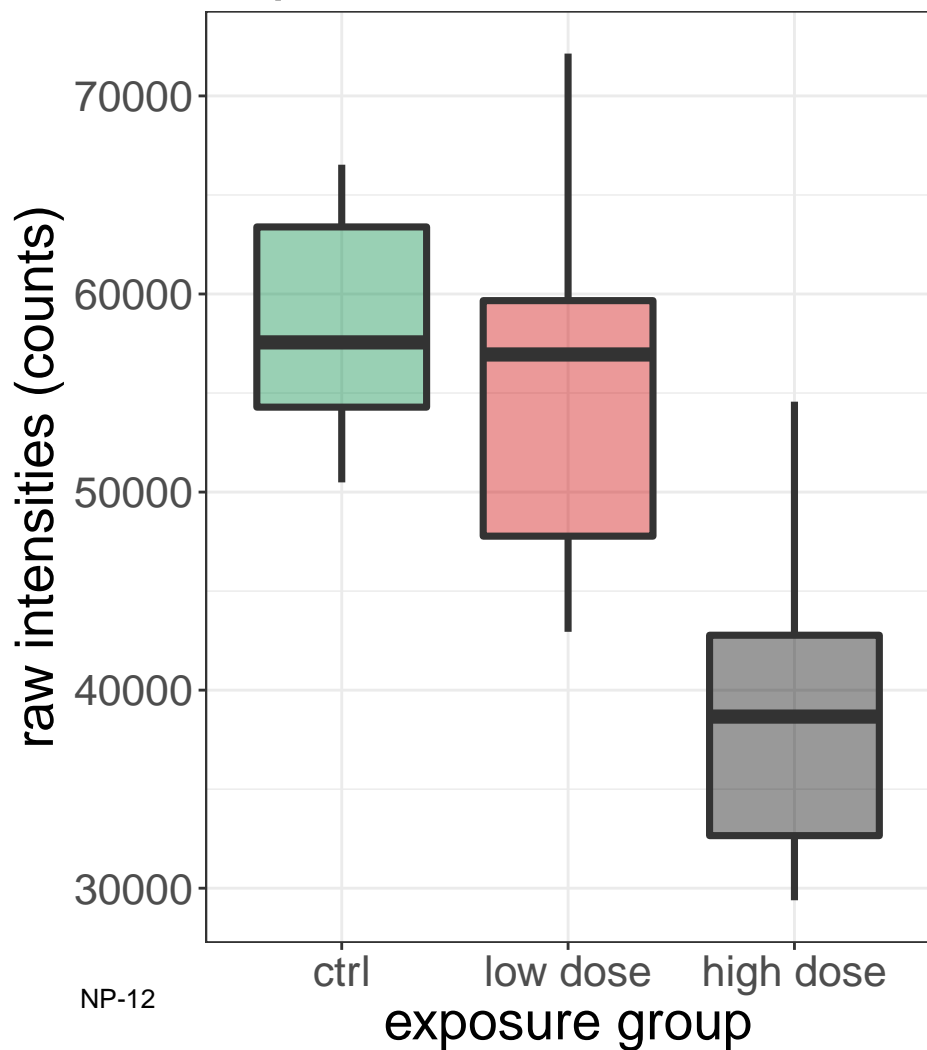

# experiment 2

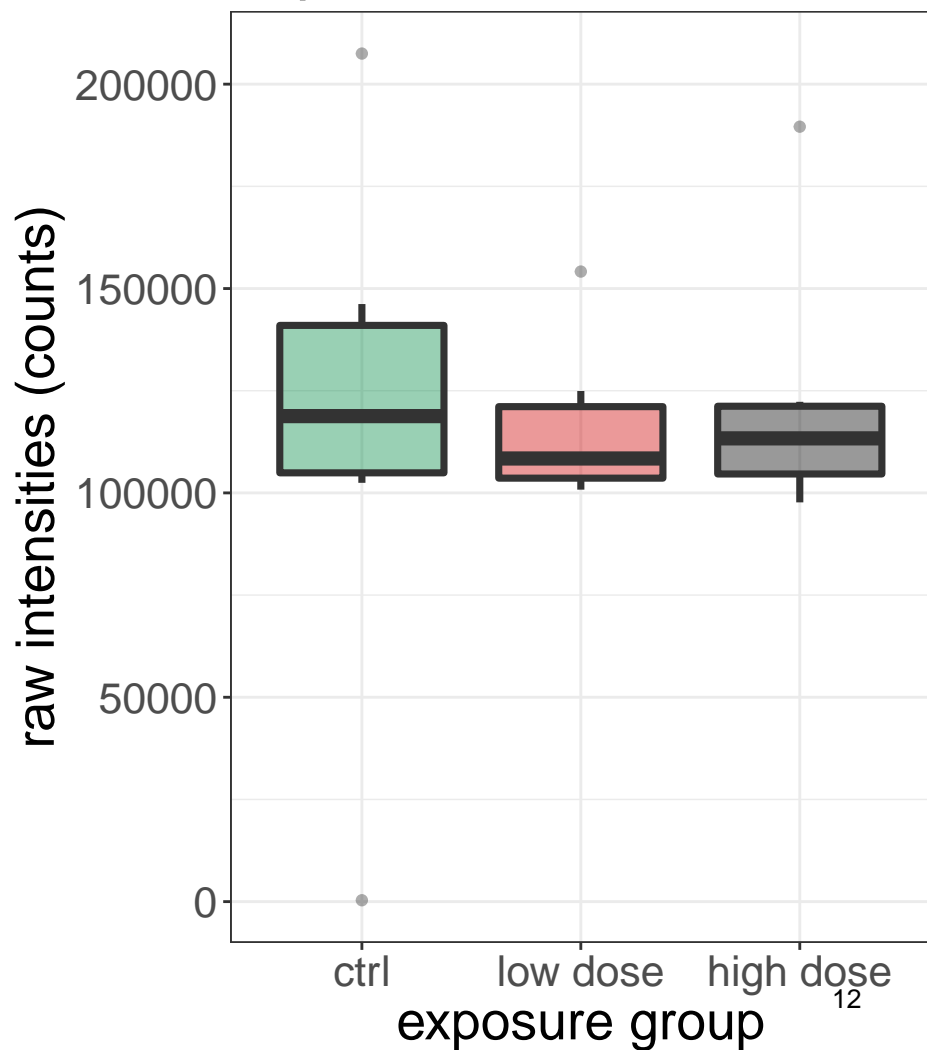

# experiment 1

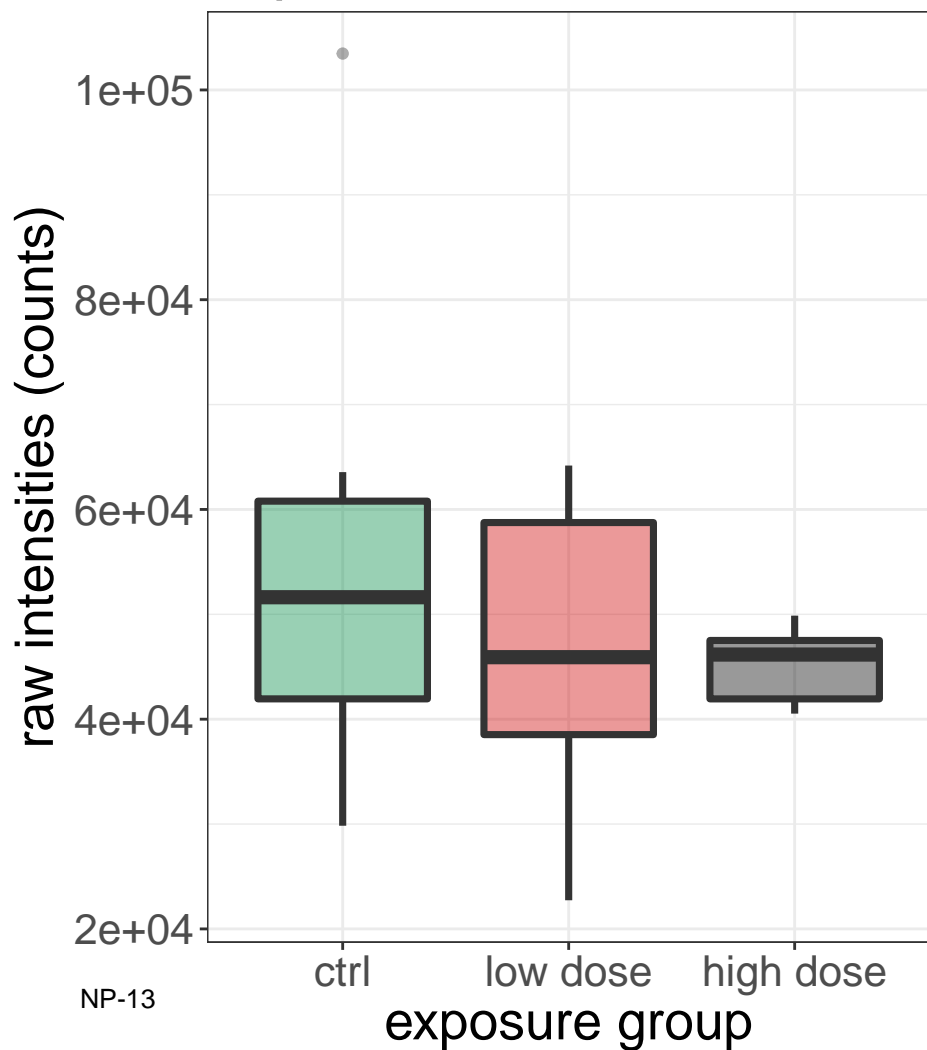

# experiment 2

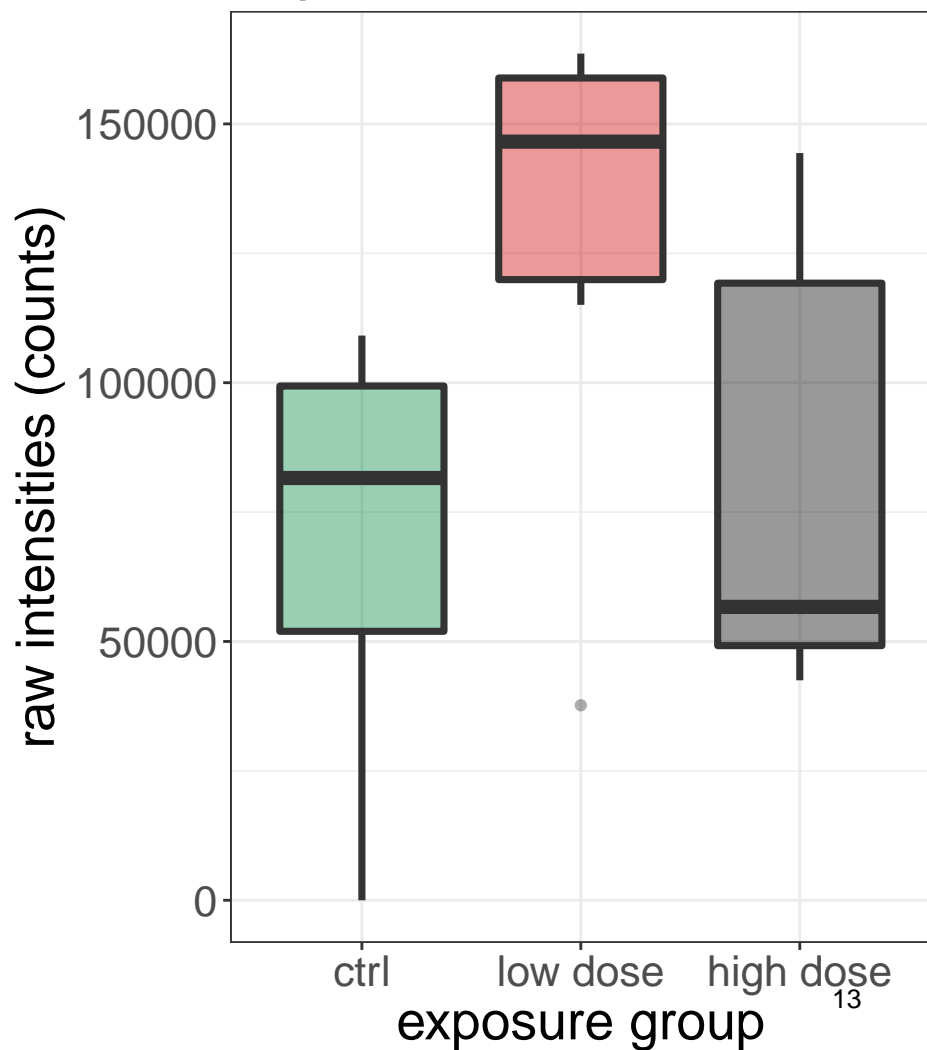

# experiment 1

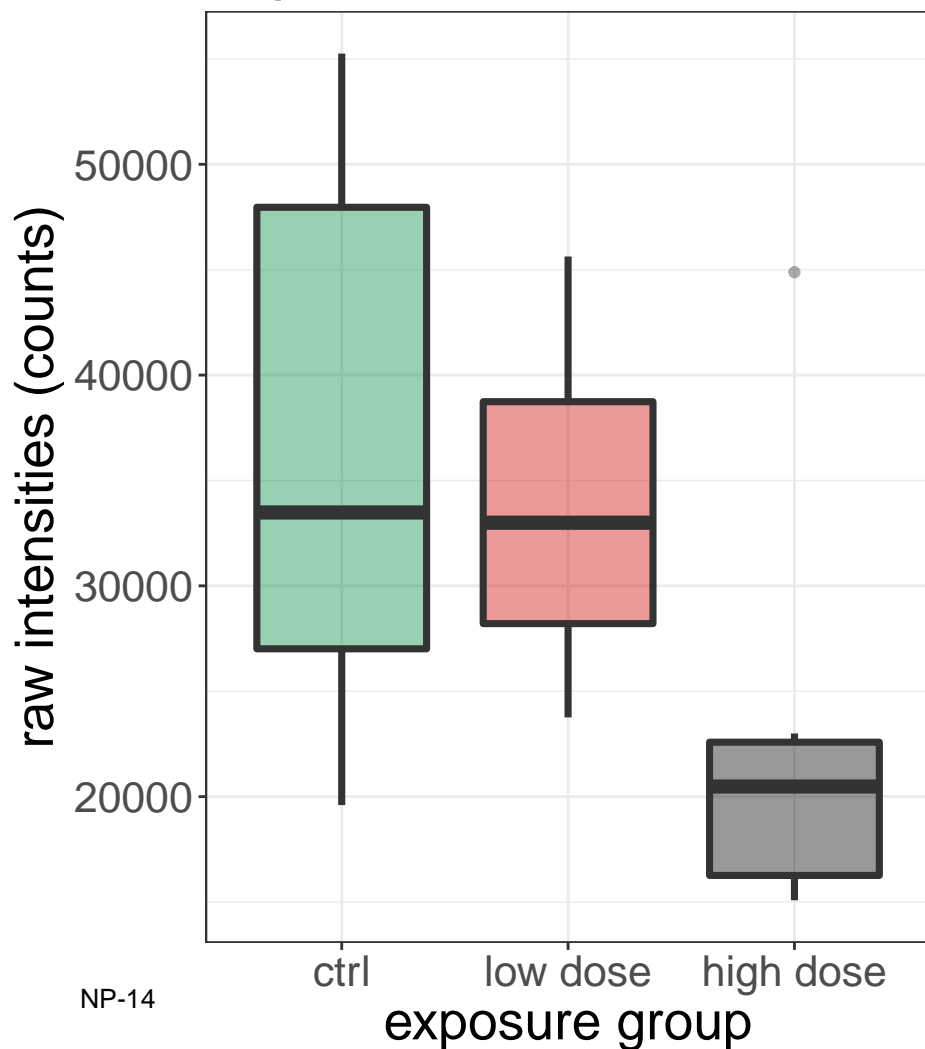

# experiment 2

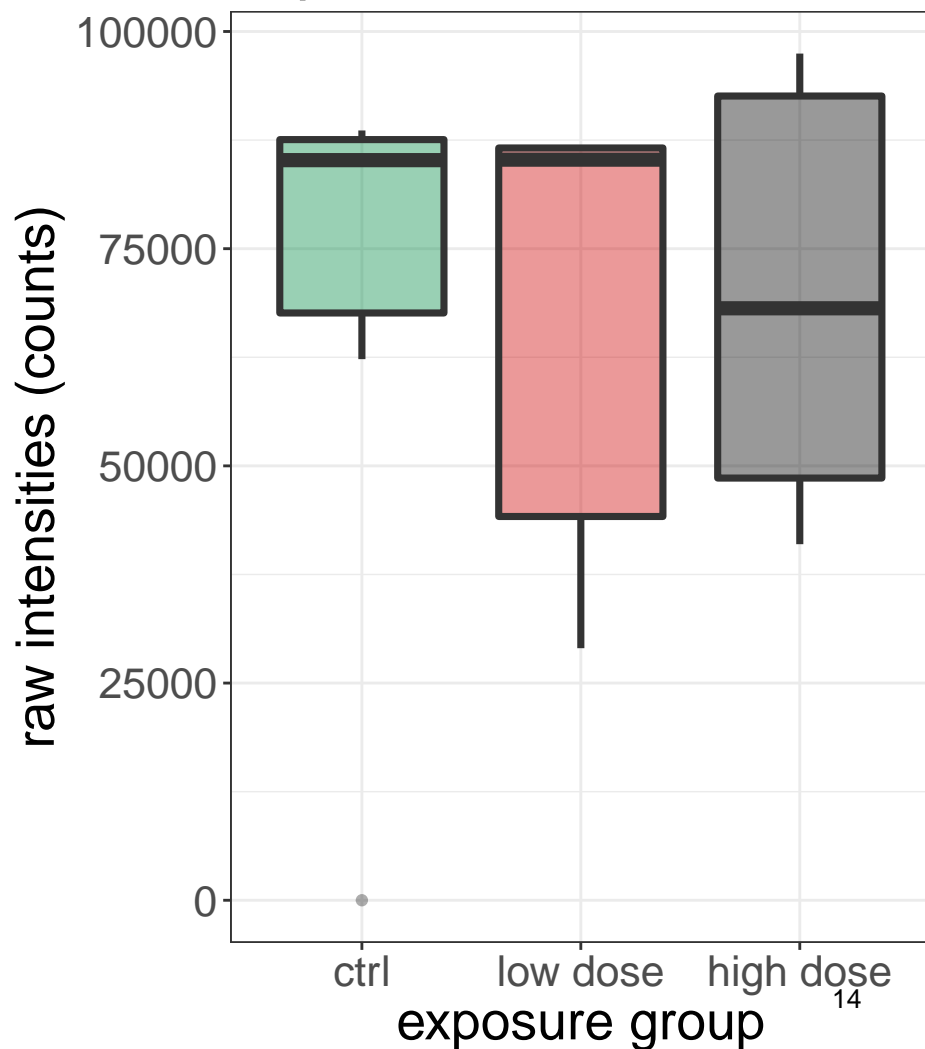

# experiment 1

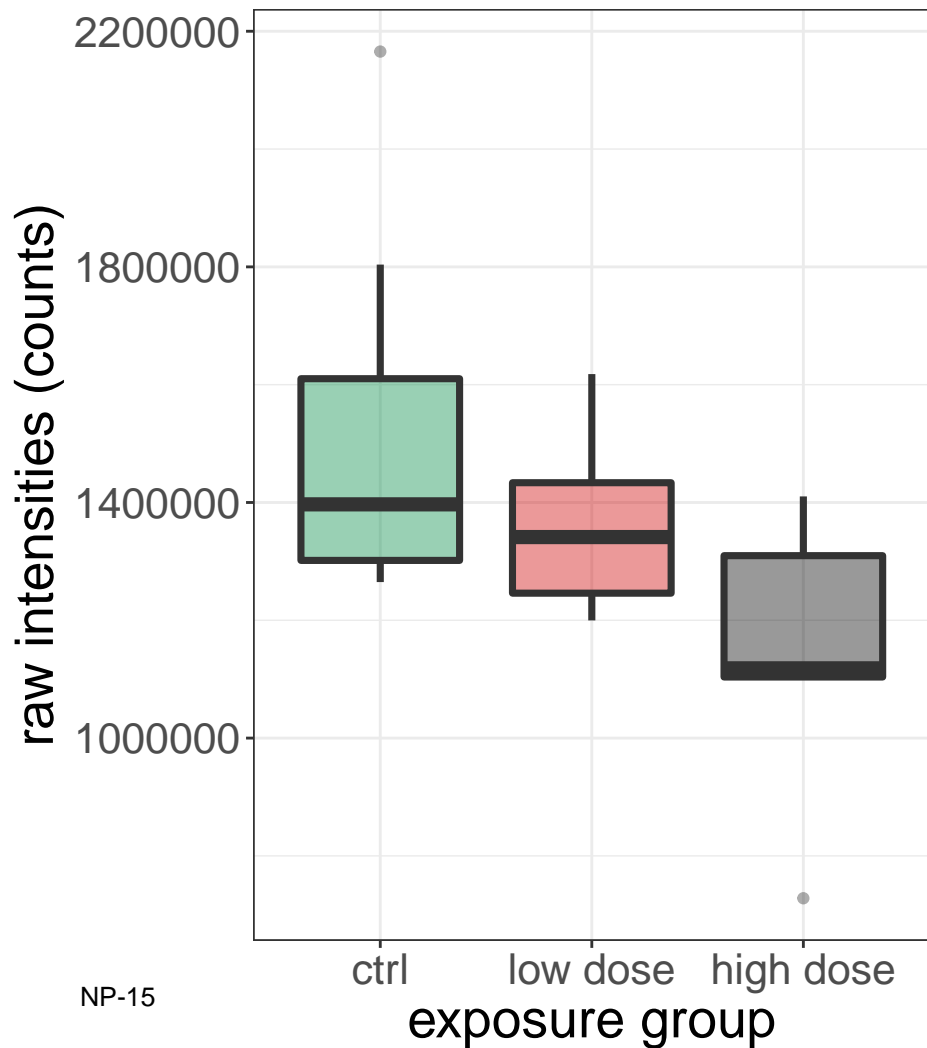

# experiment 2

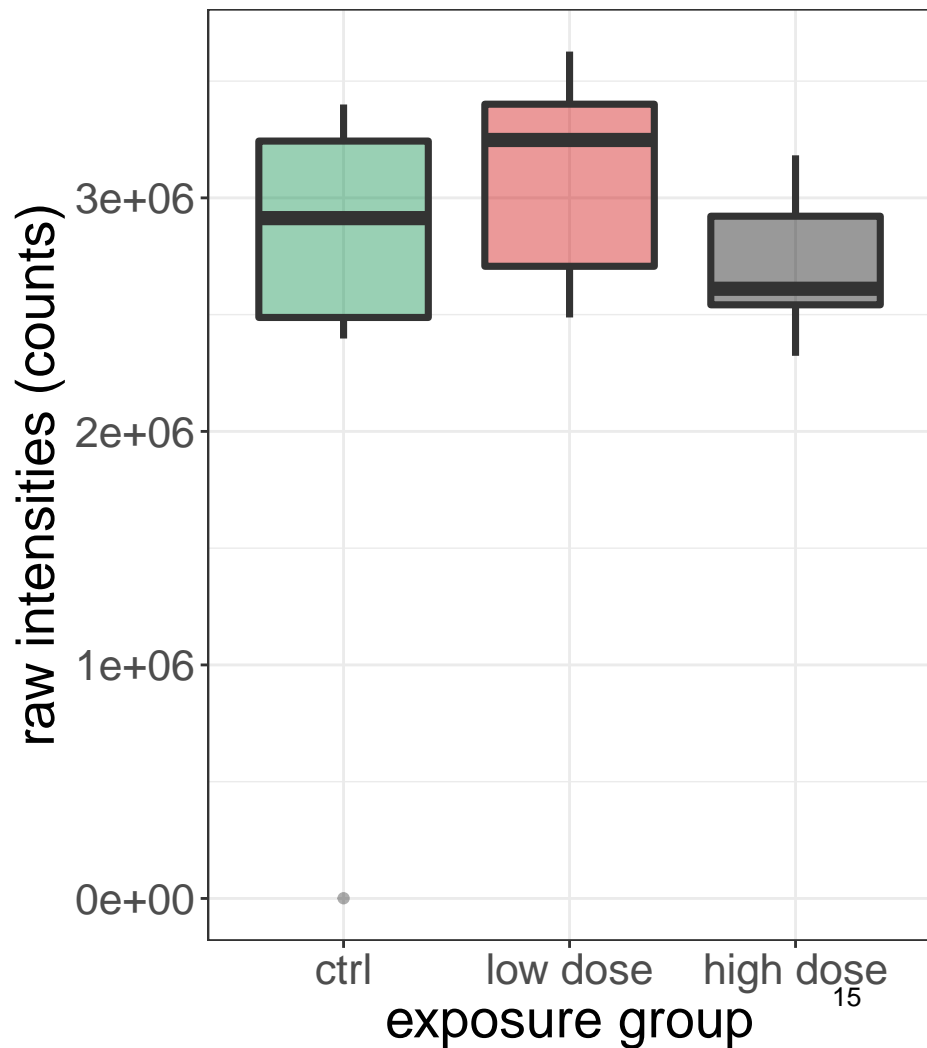

# experiment 1

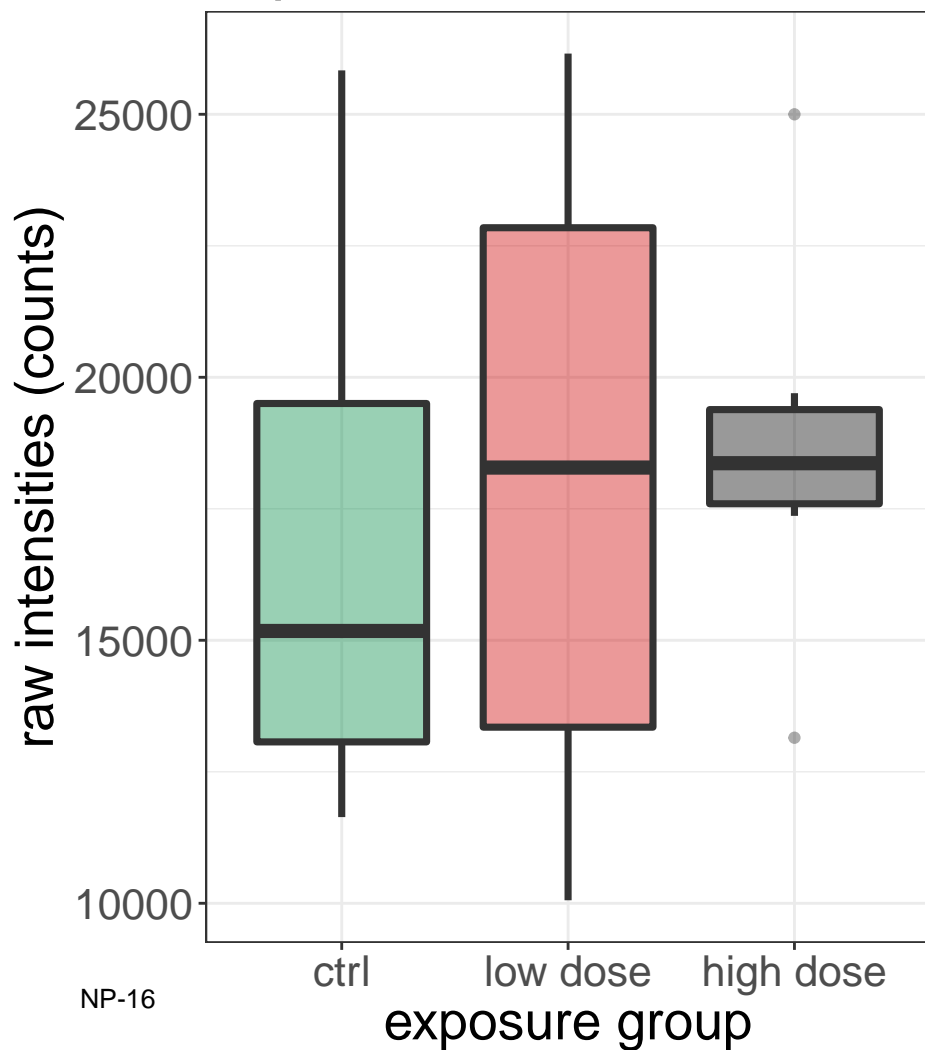

# experiment 2

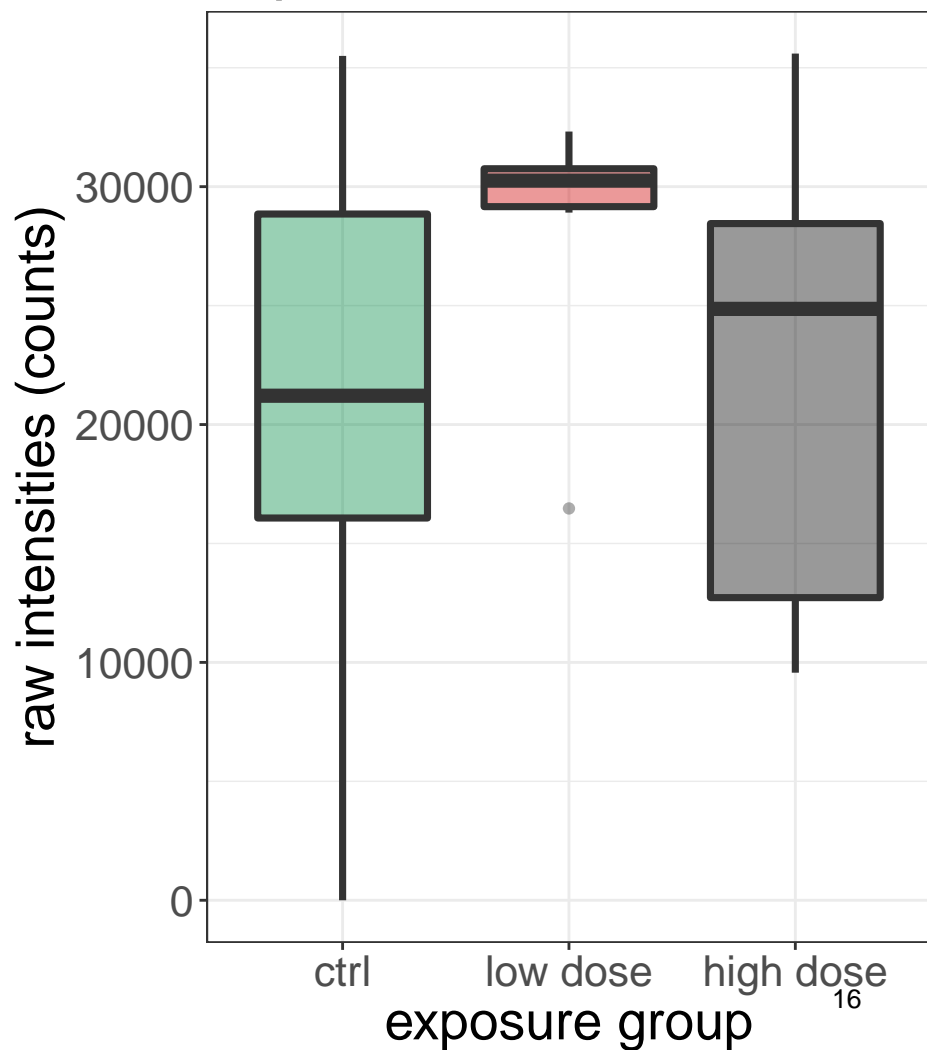



experiment 1

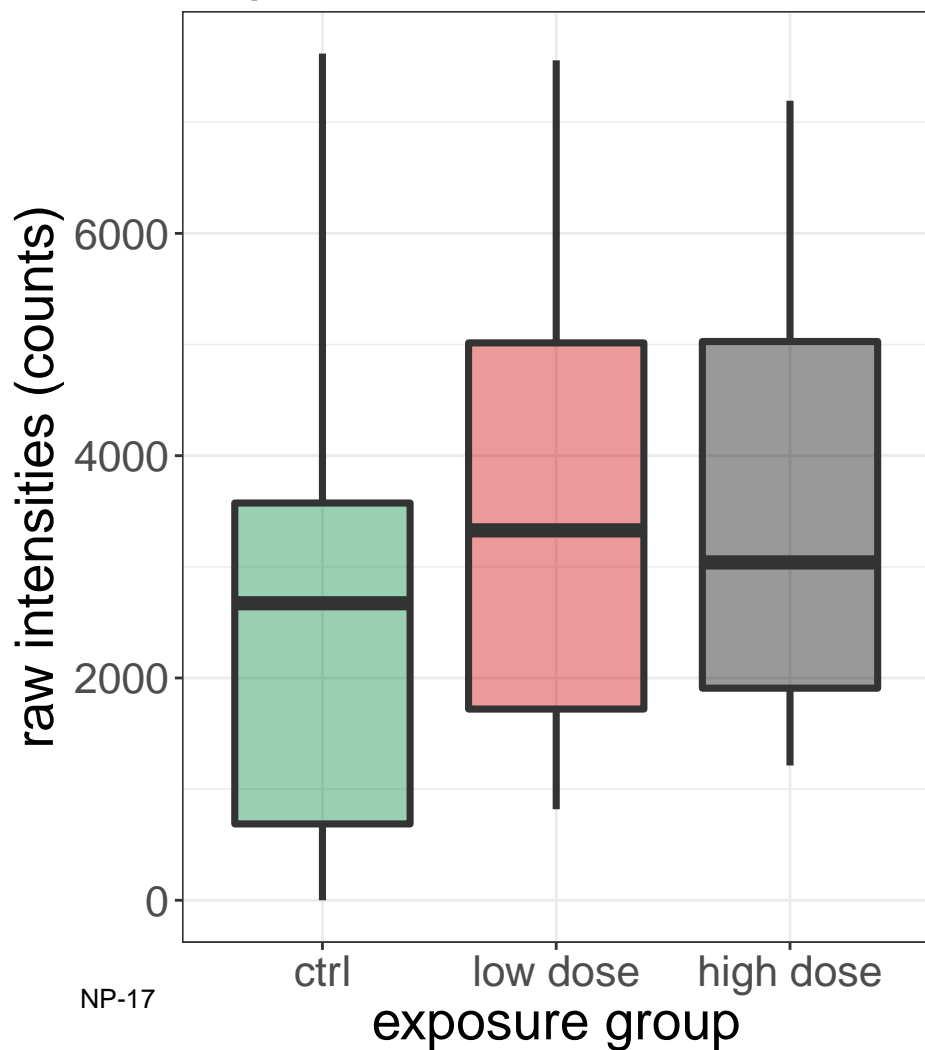

experiment 2

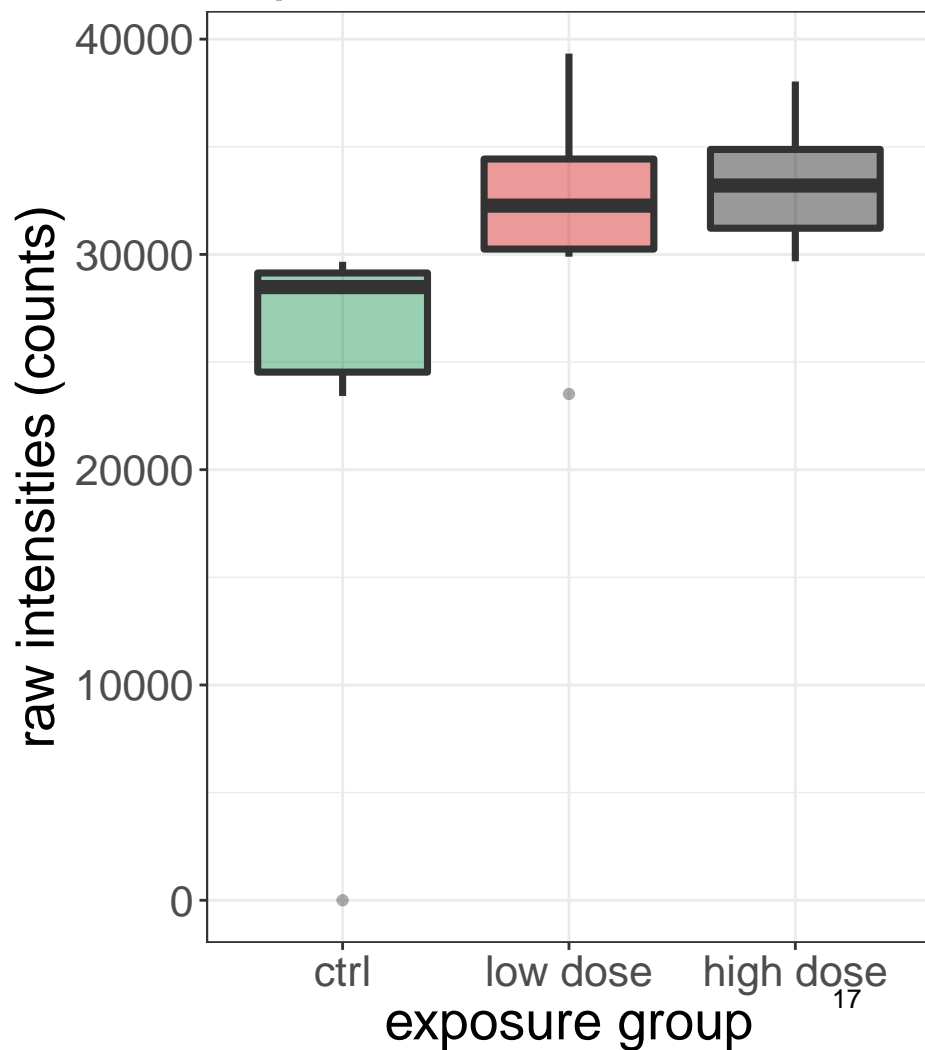

# experiment 1

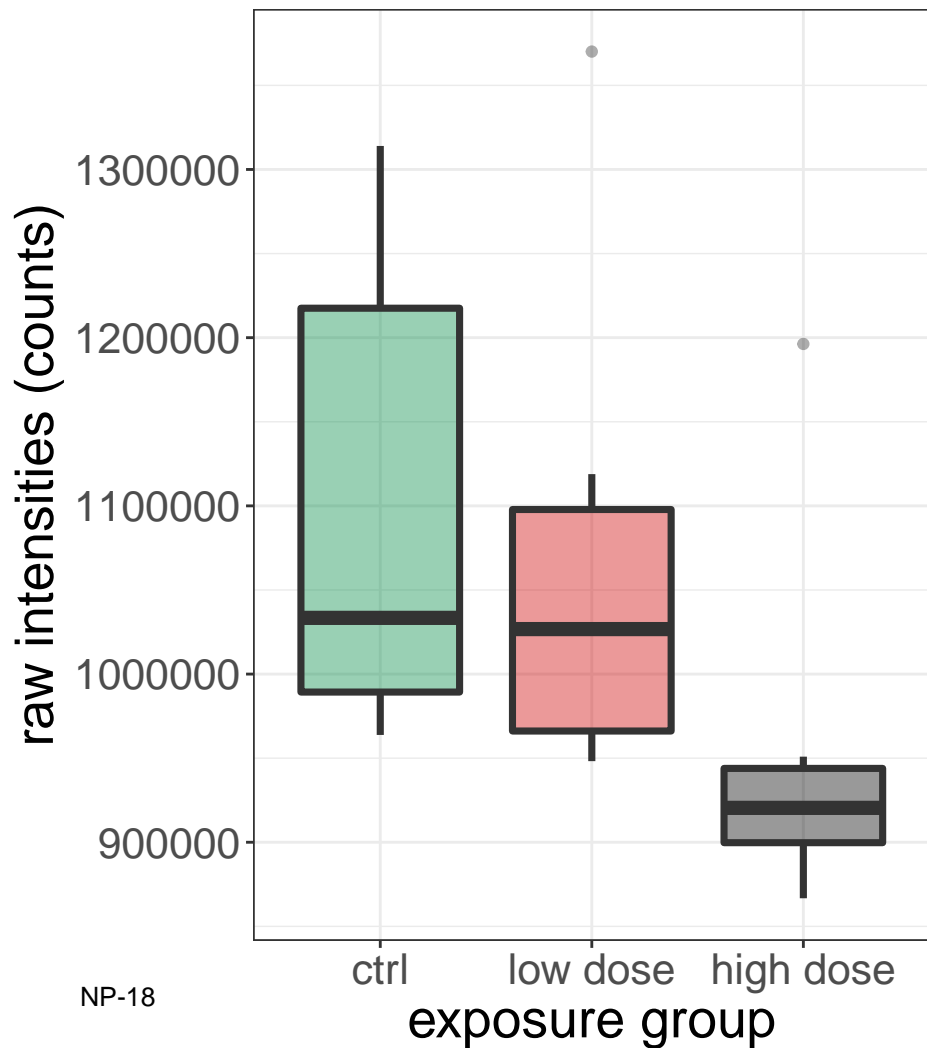

# experiment 2

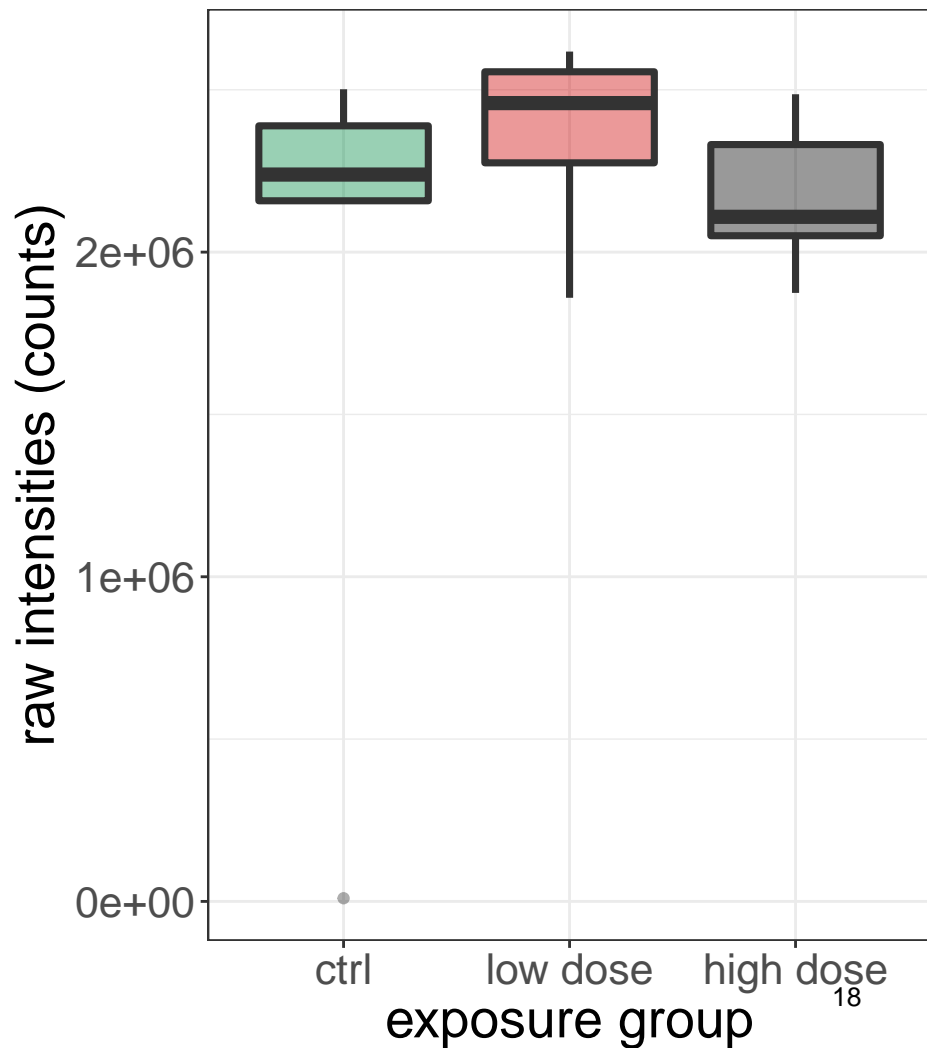

Supplement: s1 [file s1]
